## 1 Title

2 Large-scale clustering of longitudinal faecal calprotectin and C-reactive protein  
3 profiles in inflammatory bowel disease

## 4 Short title

5 Longitudinal biomarker clustering in inflammatory bowel disease

## 6 Authors

7 Nathan Constantine-Cooke<sup>1,2</sup>, Nikolas Plevris<sup>1,3</sup>, Karla Monterrubio-Gómez<sup>1,2</sup>, Clara  
8 Ramos Belinchón<sup>1,3</sup>, Solomon Ong<sup>3</sup>, Alexander T. Elford<sup>3,4</sup>, Beatriz Gros<sup>3,5</sup>, Gareth-  
9 Rhys Jones<sup>3,6</sup>, Charlie W. Lees<sup>† 1,3</sup> and Catalina A. Vallejos<sup>† 2</sup>.

10 † Joint senior authors

### 11 Affiliations

- 12 1. Centre for Genomic and Experimental Medicine, Institute of Genetics and  
13 Cancer, University of Edinburgh, Edinburgh, UK
- 14 2. MRC Human Genetics Unit, Institute of Genetics and Cancer, University of  
15 Edinburgh, Edinburgh, UK
- 16 3. Edinburgh IBD Unit, Western General Hospital, Edinburgh, UK
- 17 4. Faculty of Medicine, The University of Melbourne, Melbourne, Australia
- 18 5. Reina Sofía University Hospital, Gastroenterology and Hepatology. IMIBIC.  
19 University of Cordoba. Cordoba, Spain
- 20 6. Centre for Inflammation Research, The Queen's Medical Research Institute,  
21 University of Edinburgh, Edinburgh, UK

## 22 Abstract

### 23 Background

24 Crohn's disease (CD) and ulcerative colitis (UC) are highly heterogeneous, dynamic  
25 and unpredictable, with a marked disconnect between symptoms and intestinal

NOTE: This preprint reports new research that has not been certified by peer review and should not be used to guide clinical practice.

26 inflammation. Attempts to classify inflammatory bowel disease (IBD) subphenotypes  
27 to inform clinical decision making have been limited. We aimed to describe the latent  
28 disease heterogeneity by modelling routinely collected faecal calprotectin (FC) and  
29 CRP data, describing dynamic longitudinal inflammatory patterns in IBD.

## 30 Methods

31 In this retrospective study, we analysed patient-level longitudinal measurements of FC  
32 and CRP recorded within seven years since diagnosis. Latent class mixed models  
33 (LCMMs) were used to cluster individuals with similar longitudinal FC or CRP profiles.  
34 Associations between cluster assignment and information available at diagnosis (e.g.  
35 age, sex, and Montreal classification) were quantified using multinomial logistic  
36 regression. Differences in advanced therapy use across clusters were also explored  
37 using cumulative distributions over time. Finally, we considered uncertainty in cluster  
38 assignments with respect to follow-up length and explored the overlap between  
39 clusters identified based on FC and CRP.

## 40 Findings

41 We included 1036 patients (544 CD, 380 UC, 112 IBD-unclassified (IBDU)) in the FC  
42 analysis with a total of 10545 FC observations (median 9 per subject, IQR 6–13). The  
43 CRP analysis consisted of 1838 patients (805 CD, 847 UC, 186 IBDU) with 49364  
44 CRP measurements (median 20 per subject; IQR 10–36). Eight distinct clusters of  
45 inflammatory behaviour over time were identified by LCMM in each analysis. The  
46 clusters, FC1-8 and CRP1-8, were ordered from the lowest cumulative inflammatory  
47 burden to the highest. The clusters included groups with high diagnostic levels of  
48 inflammation which rapidly normalised, groups where high inflammation levels  
49 persisted throughout the full seven years of observation, and a series of intermediates  
50 including delayed remitters and relapsing remitters.

51 CD and UC patients were unevenly distributed across the clusters. In CD, whilst  
52 patients with upper GI involvement (L4) were less likely to be in FC1 and FC2, there  
53 was no impact on ileal versus colonic disease on cluster assignment. In UC, male sex  
54 was associated with the poorest prognostic cluster (FC8). The use and timing of  
55 advanced therapy was associated with cluster assignment, with the highest use of  
56 early advanced therapy in FC1. Of note, FC8 and CRP8 captured consistently high

57 patterns of inflammation despite a high proportion of patients receiving advanced  
58 therapy, particularly for CD individuals (56.8% and 33.3%, respectively). We observed  
59 that uncertainty in cluster assignments was higher for individuals with short  
60 longitudinal follow-up, particularly between clusters capturing similar earlier  
61 inflammation patterns. There was broadly poor agreement between FC and CRP  
62 clusters in keeping with the need to monitor both in clinical practice.

## 63 Interpretation

64 Distinct patterns of inflammatory behaviour over time are evident in patients with IBD.  
65 Cluster assignment is associated with disease type and both the use and timing of  
66 advanced therapy. These data pave the way for a deeper understanding of disease  
67 heterogeneity in IBD and enhanced patient stratification in the clinic.

68

## 69 Introduction

70 Inflammatory bowel disease (IBD), an umbrella term for Crohn's disease (CD),  
71 ulcerative colitis (UC) and inflammatory bowel disease unclassified (IBDU), has a  
72 prevalence of almost 1% in the UK population.<sup>1,2</sup> The condition is characterised by  
73 chronic relapsing and remitting inflammation of the gastrointestinal (GI) tract that  
74 confers a host of debilitating symptoms, negatively impacting quality of life.<sup>3,4</sup> Studies  
75 have clearly demonstrated that uncontrolled inflammation of the GI tract increases the  
76 risk of disease progression and complications including the development of colorectal  
77 cancer,<sup>5</sup> stricturing/penetrating complications and surgery.<sup>6,7</sup> However, IBD is highly  
78 heterogeneous with respect to symptoms, inflammatory burden, treatment response,  
79 and long-term outcomes.

80 Current IBD classification methods are mostly based on historic nomenclature which  
81 utilise baseline phenotypic characteristics and do not take into account the dynamic  
82 and unpredictable nature of the disease. Attempts at developing prediction tools to  
83 identify high risk patients have been made but again these use static clinical  
84 parameters, dismissing the changing nature of the disease.<sup>8</sup> Furthermore, they do not  
85 take into account the influence of other factors, such as advanced therapy timing, on  
86 the disease course. In the wake of the increasing prevalence of IBD and associated  
87 healthcare burden, new methods to characterise the dynamic disease course and help

88 identify at-risk individuals who require aggressive therapy with close monitoring versus  
89 those that need less intense input are essential.

90 The original IBSEN studies provided the first data on the clinical course of patients  
91 with UC and CD during the first 10-years of diagnosis.<sup>9,10</sup> However, these data were  
92 based on predefined disease patterns, rather than data driven, utilising symptoms  
93 alone. It is now widely accepted that there is a clear disconnect between inflammation  
94 and symptoms in IBD,<sup>11</sup> therefore it is imperative characterisations of disease course  
95 include objective parameters of inflammation.

96 C-reactive protein (CRP) and faecal calprotectin (FC) are well established tools for  
97 monitoring patients with IBD, but are typically interpreted in terms of the most recent  
98 measurement or short-term trends. Interrogation of long-term trends of inflammation  
99 could greatly assist clinical decision making and improve prediction of future events.  
100 Moreover, modelling inflammatory behaviour over time might be a key tool for  
101 characterising the largely unexplained heterogeneity seen in IBD, and provide new  
102 tools for disease sub-phenotyping beyond the current Montreal classification.<sup>12</sup>

103 In this study, we aimed to 1) identify groups of IBD patients with similar longitudinal  
104 patterns of inflammation 2) determine if these groupings were associated with age,  
105 sex, IBD type, Montreal classification, or early advanced therapy, and 3) explore  
106 whether subjects with similar longitudinal FC profiles also share similar CRP profiles.

## 107 **Methods**

### 108 **Ethics**

109 This project was approved by the local Caldicott Guardian (Project ID: CRD18002,  
110 registered NHS Lothian information asset #IAR-954). Patients or the public were not  
111 involved in the design, conduct, reporting or dissemination plans of our research.

### 112 **Study design**

113 This was a retrospective cohort study. Patients with a confirmed diagnosis of IBD (as  
114 per Lennard-Jones criteria)<sup>13</sup> were followed up for a period of seven years from the  
115 date of diagnosis. Baseline phenotype data (sex, age at diagnosis, IBD type, date of  
116 diagnosis) were obtained from the Lothian IBD registry (LIBDR), a retrospective cohort

117 of patients receiving IBD care in Lothian, Scotland. The LIBDR is estimated to have  
118 identified 94.3% of all true IBD patients in the area using a capture-recapture  
119 approach.<sup>1</sup> Using a population level cohort reduces potential biases associated with  
120 cohort recruitment.<sup>14</sup> When available, additional phenotyping information was  
121 extracted by the clinical team from electronic health records (TrakCare; InterSystems,  
122 Cambridge, MA). This includes smoking and Montreal classification for disease  
123 location, behaviour and extent, all recorded as per patient status at the time of  
124 diagnosis. Data on prescribing of all advanced therapies, including start/stop dates,  
125 were extracted from both TrakCare and NHS Lothian pharmacy databases. Primary  
126 care prescribing data were not available. See Supplementary Note 1 for more detailed  
127 definitions.

## 128 Inclusion/exclusion criteria

129 Subjects were required to have a confirmed diagnosis of IBD at any age and receive  
130 secondary care for their condition from the NHS Lothian health board. Only subjects  
131 with a recorded date of IBD diagnosis between 2005 and 2019 were included. The  
132 lower bound for this criteria was established as FC testing was not routinely performed  
133 prior to this date. The upper bound ensured subjects had the possibility of having at  
134 least five years of follow-up at the time of data extraction.

135 For subjects which met the above requirements, the following criteria was applied to  
136 their FC and/or CRP longitudinal measurements. Subjects were required to have a  
137 diagnostic measurement ( $\pm$  three months of diagnosis, Figures [S1](#) and [S2](#)) and have  
138 a further two observations available within seven years of diagnosis. If any biomarker  
139 measurements were observed within three months prior to the recorded diagnosis  
140 date, measurement time scales were realigned with respect to diagnosis ([Figure S3](#)).  
141 Only non-censored observations were considered in this calculation for FC. For CRP,  
142 this filtering was applied after preprocessing (see “Longitudinal measurements and  
143 preprocessing” section), and subjects with constant biomarker measurements over  
144 time were excluded. As the clustering analyses were performed separately for FC and  
145 CRP, subjects did not need to meet the criteria for both biomarkers.

## 146 Statistical analysis

### 147 Cohort description

148 Continuous variables were summarised as their median and interquartile range (IQR).

149 Categorical variables were summarised as counts and percentages.

### 150 Longitudinal measurements and preprocessing

151 FC and CRP measurements were obtained from an extract by the local biochemistry  
152 team describing tests recorded up to August 13, 2024. For each individual, all  
153 measurements made within seven years from diagnosis were considered. Failed tests,  
154 for example due to contamination, were discarded. All FC tests were performed from  
155 stool samples using the same ELISA technology.<sup>15</sup> Due to limits of detection,  
156 observations  $< 20 \mu\text{g/g}$  were recorded to  $20 \mu\text{g/g}$  whilst observations  $> 1250 \mu\text{g/g}$  were  
157 mapped to  $1250 \mu\text{g/g}$ . Such observations were treated as censored when applying the  
158 inclusion exclusion criteria described above. CRP was measured from blood samples;  
159 observations for which only an upper bound was available, e.g.  $< 1 \text{ mg/L}$ , were  
160 mapped to the corresponding upper bound.

161 Further processing was applied to CRP data to smooth out short-term fluctuations.  
162 Measurements were grouped into intervals of  $t$ :  $[0, 0.5)$ ,  $[0.5, 1.5)$ ,  $[1.5, 2.5)$ ,  $[2.5, 3.5)$ ,  
163  $[3.5, 4.5)$ ,  $[4.5, 5.5)$ ,  $[5.5, 7]$ , where  $t = 0$  (years) is the time of diagnosis. The median  
164 CRP for each interval was calculated for each subject and used as input for  
165 subsequent analyses. The centre of each interval was used as the corresponding  
166 observation time.

### 167 Longitudinal biomarker clustering

168 Prior to model fitting, FC and CRP observations were log-transformed. FC and CRP  
169 trajectories were modelled separately using latent class mixed models (LCMMs),<sup>16</sup> an  
170 extension of linear mixed effects models that enables clustering of individuals that  
171 share similar longitudinal biomarker trajectories. LCMM consists of two submodels:  
172 one which captures the longitudinal behaviour of the biomarker, and one which  
173 captures cluster assignment. Fixed effects for the longitudinal submodel were  
174 specified using natural cubic splines with three interior knots placed at quantiles with  
175 respect to observation times. An alternative specification was considered leading to

176 similar results. Only the intercept was treated as a random effect. The cluster  
177 assignment submodel used IBD type (CD, UC, and IBDU) as a covariate. Formal  
178 definitions of the LCMM models considered here and the associated hyper-parameter  
179 choices are provided in Supplementary Note 2.

180 As the number of clusters is not known a priori, the optimal model was found using a  
181 grid search approach. We considered models with 2–10 clusters for both FC and CRP.  
182 The likelihood based statistics,<sup>17</sup> Akaike information criterion (AIC) and Bayesian  
183 information criterion (BIC), and visual inspection of cluster trajectories were used to  
184 compare models with different specifications and determine the most appropriate  
185 number of assumed clusters.

186 LCMM calculates, for each individual, the probability of being assigned to each cluster.  
187 In subsequent analysis, each individual was assigned to the cluster with the highest  
188 probability. The distribution of cluster assignment probabilities was used to assess  
189 uncertainty in these allocations with respect to follow-up length. This was defined as  
190 the time difference between diagnosis and the last available biomarker measurement  
191 (FC or CRP, depending on the analysis). For each cluster, the average probability of  
192 individual-specific probabilities of cluster assignment were reported.

193 To avoid displaying potentially identifiable individual-level data, exemplar trajectories  
194 within each cluster are visualised as aggregated trends, where measurements were  
195 summarised as the median across six randomly selected individuals. Cluster labels  
196 were ordered based on the area under the overall biomarker trend inferred for each  
197 cluster (a proxy for cumulative inflammatory burden).

## 198 Associations with respect to cluster assignments

199 To facilitate the interpretation of each cluster, we considered potential associations  
200 between cluster assignments and patient-level information. Violin plots and  
201 percentage bar plots were used as a visual summary when considering continuous  
202 (age) and discrete (sex, IBD type, additional phenotyping) patient-level covariates,  
203 respectively. Associations with respect to additional phenotyping were only explored  
204 after stratifying by IBD type (CD and UC only). Multinomial logistic regression was  
205 used to quantify associations between cluster assignments and patient-level  
206 covariates. The cluster used as the reference class was chosen to closely resemble  
207 the overall distribution of IBD types within the corresponding cohort. Univariate and

208 multivariate models were considered, and the associated 95% confidence intervals  
209 are reported. Individuals with missing covariate values were excluded when fitting  
210 each model. Due to small cluster sizes and low frequency of some covariate levels,  
211 the analysis was repeated after merging clusters with similar cumulative inflammatory  
212 burden. Effect sizes were largely consistent (data not shown).

### 213 Advanced therapy use

214 To compare patterns of advanced therapy (AT) across clusters, the cumulative  
215 distribution of first-line advanced therapy use was calculated. Results are reported  
216 stratified by IBD type (CD and UC only).

### 217 Comparison between FC and CRP cluster assignments

218 For subjects meeting the criteria for both FC and CRP analyses, the relationship  
219 between FC and CRP cluster assignment was visualised using alluvial plots and side-  
220 by-side comparisons of mean cluster trajectories for the optimal models. Stratified  
221 results for CD and UC subjects are also reported.

### 222 Software

223 R (v. 4.4.0), extended using the lcmm (v. 2.1.0),<sup>18</sup> ggalluvial (v.0.12.5),<sup>19</sup> and datefixR  
224 (v.1.6.1)<sup>20</sup> packages, was used for all analyses. Analytical reports have been  
225 generated using the Quarto scientific publishing system and are hosted online  
226 (<https://vallejosgroup.github.io/Lothian-IBDR/>). An R package, libdr (v.1.0.0), has also  
227 been produced, supporting the reuse of our R code with other datasets.

### 228 Role of the funding source

229 Funders were not involved in the study design, collection, analysis, or interpretation  
230 of the data, writing, or decision to submit the paper for publication.



## 231 Results

### 232 Cohort derivation and description

233 Of the 10153 subjects with a confirmed IBD diagnosis, 5508 were reported as being  
 234 diagnosed between 2005 and 2019 ([Figure 1](#)). Of these subjects, 1036 and 1838  
 235 subjects were included in the FC and CRP analysis, respectively. We identified 808  
 236 subjects which met the inclusion criteria for both biomarkers. [Table 1](#) describes key  
 237 demographic factors for subjects included in the FC and CRP analyses.

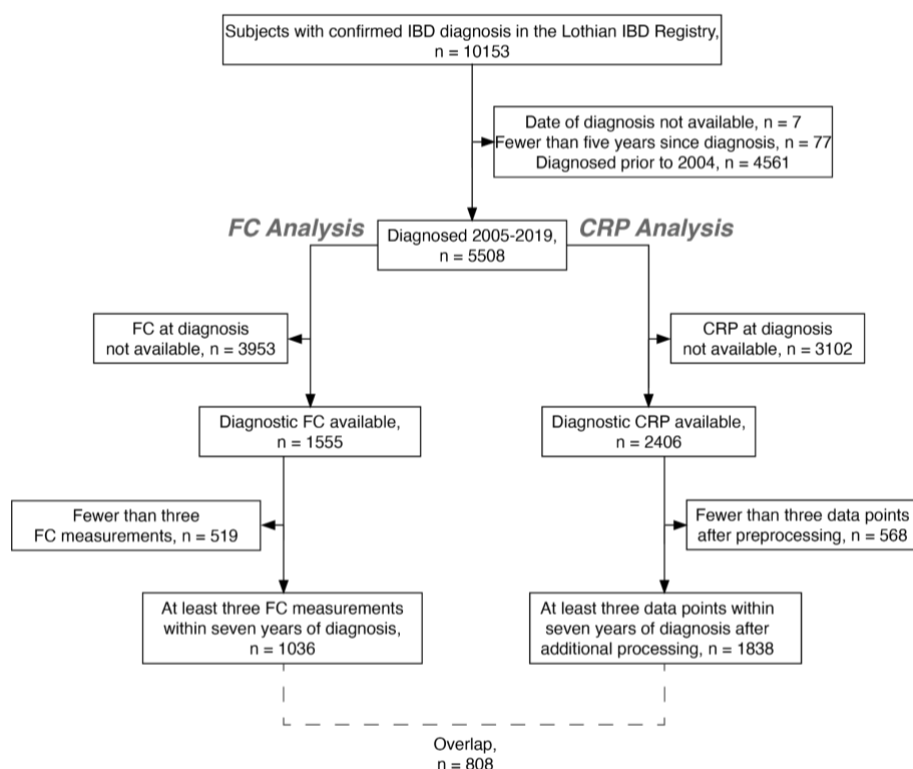

238  
 239 *Figure 1. Derivation of the study cohorts based on separate faecal calprotectin (FC) and C-reactive*  
 240 *protein (CRP) inclusion/exclusion criteria.*

241

|                         | FC analysis<br>(n = 1036) | CRP analysis<br>(n = 1838) | Overlap<br>(n = 808) |
|-------------------------|---------------------------|----------------------------|----------------------|
| Age at diagnosis        | 33 (25–75)                | 37 (24–55)                 | 32 (20–50)           |
| Male sex                | 503 (48.6%)               | 956 (52.0%)                | 397 (49.1%)          |
| IBD type                |                           |                            |                      |
| Crohn's disease (CD)    | 544 (52.5%)               | 805 (43.8%)                | 451 (55.8%)          |
| Ulcerative colitis (UC) | 380 (36.7%)               | 847 (46.1%)                | 276 (34.2%)          |

|                                             |                |             |                |
|---------------------------------------------|----------------|-------------|----------------|
| IBDU                                        | 112 (10.8%)    | 186 (10.1%) | 81 (10.0%)     |
| Baseline FC (µg/g)                          | 740 (320–1070) | ..          | 760 (330–1081) |
| FC observations                             | 9 (6–13)       | ..          | 9 (6–14)       |
| Baseline CRP (µg/mL)                        | ..             | 8 (3–24)    | 8 (3–20)       |
| Total unprocessed CRP observations          | ..             | 20 (10–36)  | 26 (14–36)     |
| Total CRP observations after pre-processing | ..             | 6 (4–7)     | 6 (5–7)        |
| <b>Advanced therapies (AT)</b>              |                |             |                |
| AT within seven years for CD                | 270 (49.6%)    | 374 (46.5%) |                |
| AT within one year for CD                   | 129 (23.7%)    | 167 (20.7%) |                |
| AT within seven years for UC                | 108 (28.4%)    | 85 (10.0%)  |                |
| AT within one year for UC                   | 42 (11.1%)     | 35 (4.1%)   |                |
| <b>Crohn's disease</b>                      |                |             |                |
| Montreal location                           |                |             |                |
| L1                                          | 168 (30.9%)    | 249 (30.9%) | 136 (30.2%)    |
| L2                                          | 200 (36.8%)    | 287 (35.7%) | 157 (34.8%)    |
| L3                                          | 169 (31.1%)    | 246 (30.6%) | 153 (33.9%)    |
| Missing                                     | 7 (1.3%)       | 23 (2.9%)   | 5 (1.1%)       |
| Upper GI inflammation                       |                |             |                |
| Present                                     | 77 (14.2%)     | 87 (10.8%)  | 68 (15.1%)     |
| Not Present                                 | 467 (85.8.4%)  | 718 (89.2%) | 383 (84.9%)    |
| Montreal behaviour                          |                |             |                |
| B1                                          | 443 (81.4%)    | 607 (75.4%) | 364 (80.7%)    |
| B2                                          | 63 (11.5%)     | 110 (13.7%) | 54 (12.0%)     |
| B3                                          | 28 (5.1%)      | 61 (7.6%)   | 25 (5.5%)      |

|                         |             |             |             |
|-------------------------|-------------|-------------|-------------|
| Missing                 | 10 (1.8%)   | 27 (3.4%)   | 8 (1.8%)    |
| <b>Perianal disease</b> |             |             |             |
| Present                 | 79 (14.5%)  | 113 (14.0%) | 68 (15.1%)  |
| Not Present             | 459 (84.4%) | 673 (83.6%) | 379 (84.0%) |
| Missing                 | 6 (1.1%)    | 19 (2.4%)   | 4 (0.9%)    |
| <b>Smoking status</b>   |             |             |             |
| Current or previously   | 166 (30.5%) | 274 (34.0%) | 138 (30.6%) |
| Never                   | 352 (64.7%) | 484 (60.1%) | 293 (65.0%) |
| Missing                 | 26 (4.8%)   | 47 (5.8%)   | 20 (4.4%)   |

242 *Table 1. Demographic and clinical data at diagnosis for subjects meeting the faecal calprotectin (FC)*  
 243 *or C-reactive protein (CRP) study inclusion criteria. Continuous data are presented as median and*  
 244 *interquartile range. Categorical data are presented as counts and percentages. Missingness is only*  
 245 *directly reported if values were missing. The column labelled as “Overlap” denotes subjects which met*  
 246 *the inclusion criteria for both FC and CRP modelling. Missing observations for upper gastrointestinal*  
 247 *inflammation were assumed to be “not present” (Supplementary Note 1). Missingness was not*  
 248 *inferred to be a value for any other variable.*

## 249 Longitudinal measurements of FC and CRP

250 For subjects in the FC analysis, 10545 FC observations were available (median 9 per  
 251 subject, IQR 6–13). Prior to processing 49364 CRP observations were available  
 252 (median 20 per subject, IQR 10–36). Following the pre-processing of CRP  
 253 observations, there were 9898 data points (median 6 per subject, IQR 4–7). The  
 254 distribution of log-transformed FC and CRP values is shown in [Figure S4](#).

## 255 Modelling of FC trajectories

256 AIC suggested the 10-cluster model ([Figure S5](#)), whilst BIC suggested the 9-cluster  
 257 model ([Figure S6](#)) was more appropriate ([Table S1](#), [Figure S7A](#)). However, the 8-  
 258 cluster model was chosen as a parsimonious choice, as it captures the main observed  
 259 longitudinal patterns without generating very small clusters (<50 individuals) which  
 260 could be difficult to interpret.

261 [Figure 2](#) shows representative cluster profiles for the 8-cluster model, ordered from  
 262 lowest (FC1) to highest (FC8) cumulative inflammatory burden. FC2 (n=67; ~6%)

263 represents low FC values throughout the whole observation period. Instead, FC1  
264 (n=140; ~14%) and FC3 (n=157; ~15%) and FC7 (n=244; ~24%) were characterised  
265 by initially high FC values (>250 µg/g) which decreased over time at different rates.  
266 Whilst FC1 exhibited a sharp decrease within the first year, the decrease was more  
267 gradual for FC3 and FC7, where FC was normalised (<250 µg/g) approximately  
268 around two and five years post diagnosis, respectively. Furthermore, FC4 (n=103;  
269 ~10%), FC5 (n=67; ~6%) and FC6 (n=64; ~6%) capture relapsing and remitting  
270 patterns of gastrointestinal inflammation. Finally, FC8 (n=194; ~19%) represented  
271 individuals with consistently high FC values.

272

## 273 Associations with respect to FC cluster assignments

274 Associations with respect to age, sex and IBD type were first considered. Whilst the  
275 effect of age and sex was not substantial ([Figure S8](#)), this was not the case for IBD  
276 type ([Figure S9](#)). For example, IBDU and UC patients were less likely to be assigned  
277 to FC6 (1.56% IBDU and 28.1% UC vs 11.4% and 37.3% respectively elsewhere).

278 A similar analysis was performed after stratifying by IBD type (UC and CD only) and  
279 considering additional phenotyping ([Figures S10 - S16](#)). In most cases, effect sizes  
280 were not statistically significant (in some cases this was due to low counts and small  
281 cluster sizes). However, amongst CD patients, those without upper GI inflammation  
282 were more likely to be assigned to FC1 or FC2 (2.4% and 3.03% L4 vs 18.1%  
283 elsewhere). In UC, and to some extent CD, males were more likely to be assigned to  
284 FC8 (72% male versus 49.7% elsewhere). Finally, UC patients with ulcerative proctitis  
285 were found to be less likely to be assigned to FC3 (2.44% E1 versus 14.2%  
286 elsewhere).

## 287 FC cluster assignment and advanced therapy usage

288 In total, 270 (49.6%) CD and 108 (28.4%) UC subjects received an advanced therapy  
289 within the seven year observation period ([Table 1](#)). Overall AT rates and the  
290 distribution of time to first AT were not homogeneous across clusters ([Figure 3](#)). For  
291 example, whilst AT prescription rates in FC1 largely matched the overall FC cohort,  
292 prescriptions were generally earlier in this cluster, especially in CD patients. It was  
293 noteworthy that patients in FC8, with consistently high FC levels and later onset of AT,

294 had cumulative AT rates of 56.8% in CD and 37.9% in UC by the end of the seven  
295 year observation period.

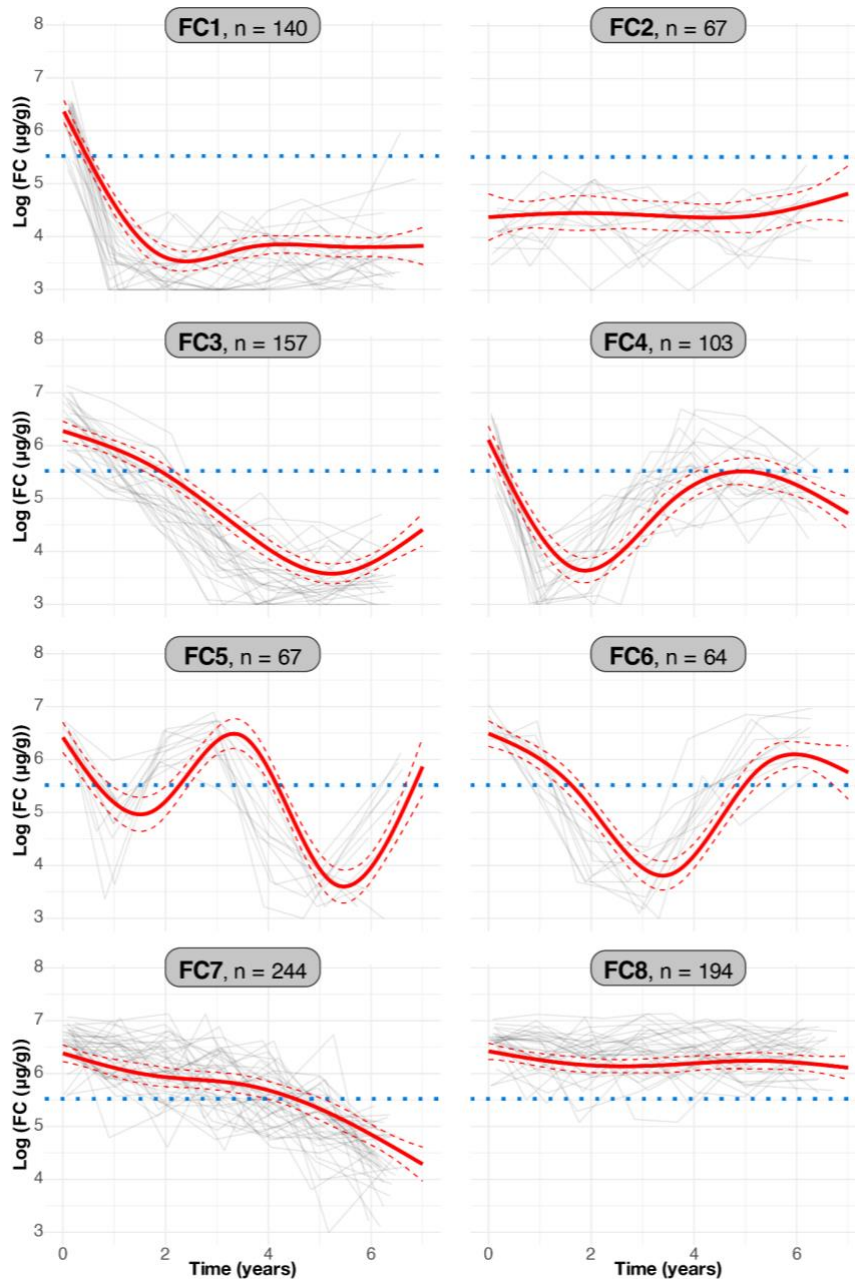

296

297

298 *Figure 2. Cluster trajectories obtained from LCMM assuming eight clusters fitted to FC data (log-*

299 *transformed). Red lines indicate predicted mean cluster profiles with 95% confidence intervals. The*

300 *blue dotted lines indicate log(250µg/g). For visualisation purposes, pseudo subject-specific*

301 *trajectories have been generated by amalgamating observations from randomly selected groups of six*

302 *subjects. Clusters are ordered from lowest (FC1) to highest (FC8) cumulative inflammatory burden.*

303 *Cluster sizes are shown as panel titles.*

## 304 Modelling of CRP trajectories

305 AIC and BIC both suggested the 8-cluster model was the most appropriate ([Table S4](#)).  
306 Visual inspection also supported this finding as the 9-cluster model did not identify new  
307 trajectories when compared to the 8-cluster model, producing two trajectories with  
308 consistently low CRP ([Figure S8](#)). In contrast, the 7-cluster model ([Figure S9](#)) lacks  
309 one of the clinically interesting trajectories, characterised by an initially elevated CRP  
310 which then decreases to slightly above biochemical remission after one year, when  
311 compared to the 8-cluster model.

312 [Figure 4](#) presents exemplar cluster profiles for the 8-cluster model. Over a third of  
313 subjects (n=702; ~38%) were assigned to CRP1 which was defined by consistently  
314 low CRP. CRP2 (n=225; ~12%) was characterised by high CRP at diagnosis which  
315 rapidly decreased shortly thereafter remaining low. CRP3 (n=51; ~3%) and CRP4  
316 (n=60; ~3%) are both small clusters with the former described by low CRP until the  
317 last year of follow-up and the latter presenting as low inflammation within the first year  
318 of diagnosis before increasing until the third year where the inflammation then  
319 decreases again. CRP5 (n=110; 6%) is characterised by elevated CRP at diagnosis  
320 which then decreases gradually over time. CRP6 (n=434; 24%) consists of trajectories  
321 which are elevated at diagnosis which then falls slightly for the first two years after  
322 diagnosis, remaining elevated across the remaining duration of follow-up. CRP8  
323 (n=172; 9%) is consistently elevated and does not change over time.

## 324 Associations with CRP cluster assignments

325 [Figure S19](#) and [S20](#) visualise the distribution of age, sex and IBD type within each  
326 CRP cluster. Older patients were more likely to be assigned to a CRP cluster with  
327 higher cumulative inflammatory burden. IBD type was not evenly distributed among  
328 CRP clusters, with CRP1, CRP3, CRP4 and CRP7 enriched for UC patients (59.3%,  
329 56.8%, 61.7% and 72.6% UC vs 32.3% elsewhere). Amongst CD patients, higher  
330 smoking rates were generally observed for CRP clusters with higher inflammatory  
331 burden (e.g. 26.9% in CRP1, 54.0% in CRP8; [Figure S21](#)), but there were not  
332 substantial differences when considering Montreal location and behaviour, or upper  
333 gastrointestinal inflammation ([Figures S22 - S24](#)). AT prescribing patterns in CRP  
334 clusters are shown in [Figure S25](#).

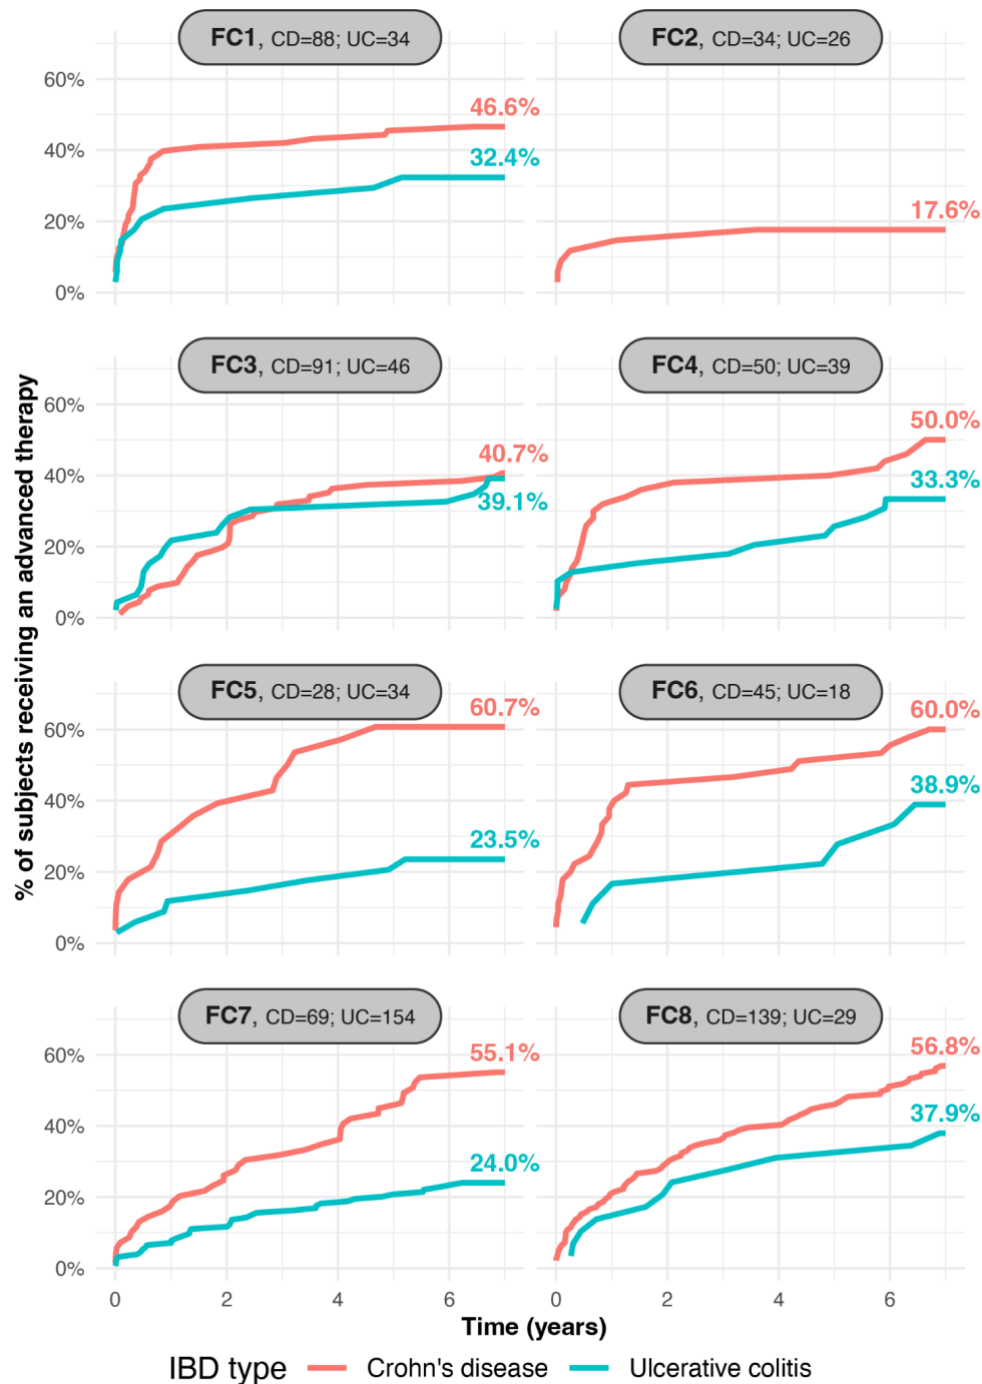

335  
336  
337  
338  
339  
340  
341

*Figure 3. FC cluster-specific cumulative distribution for first-line advanced therapy prescribing for Crohn's disease (red) and ulcerative colitis (teal) subjects. Clusters are ordered from lowest (FC1) to highest (FC8) cumulative inflammatory burden. The number of CD and UC subjects present in each cluster is displayed as panel titles. Total advance therapy prescribing (as a percentage of the corresponding group) within seven years from diagnosis is shown next to each distribution curve. Curves which would describe fewer than five subjects are not shown.*

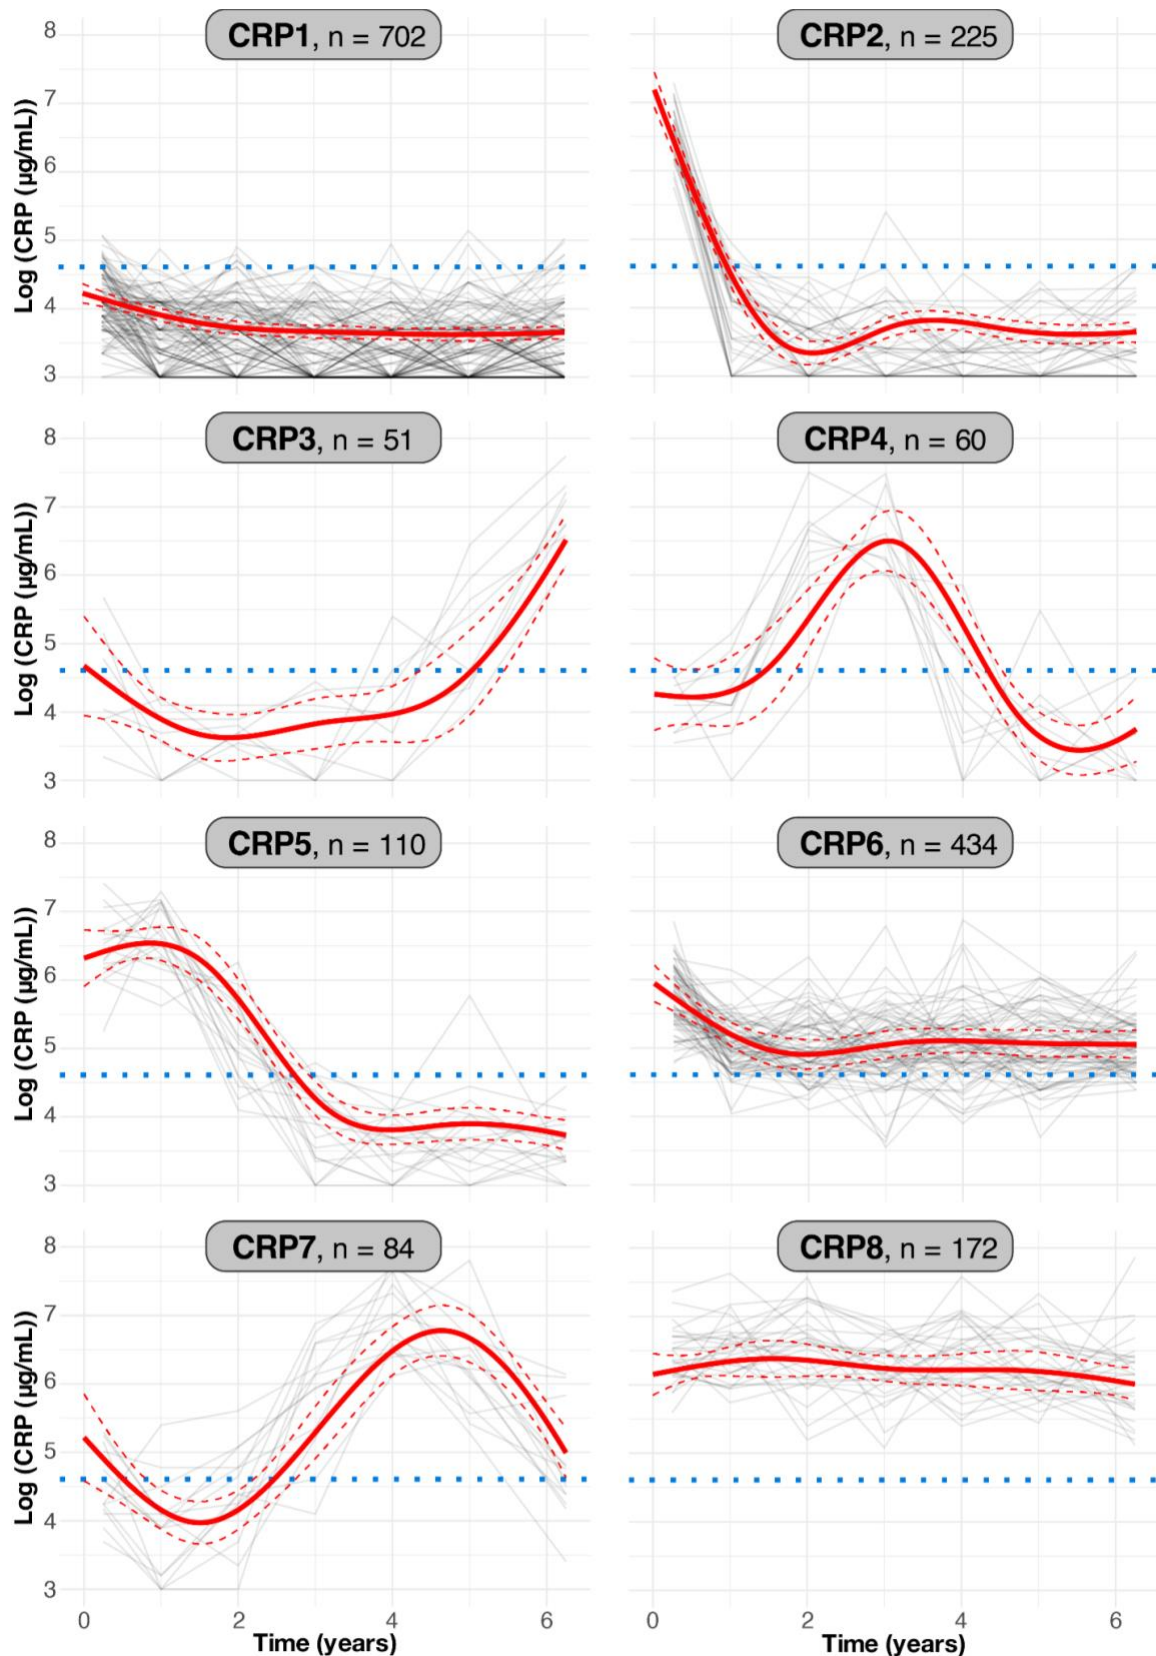

342  
343  
344  
345  
346

Figure 4. Cluster trajectories obtained from LCMM assuming eight clusters fitted to processed CRP data (log-transformed). Red lines indicate predicted mean cluster profiles with 95% confidence intervals. The blue dotted lines indicate  $\log(5\mu\text{g/mL})$ . For visualisation purposes, pseudo subject-specific trajectories have been generated by amalgamating observations from randomly selected



347 groups of six subjects. Clusters are ordered from lowest (CRP1) to highest (CRP8) cumulative  
 348 inflammatory burden. Cluster sizes are shown as panel titles.

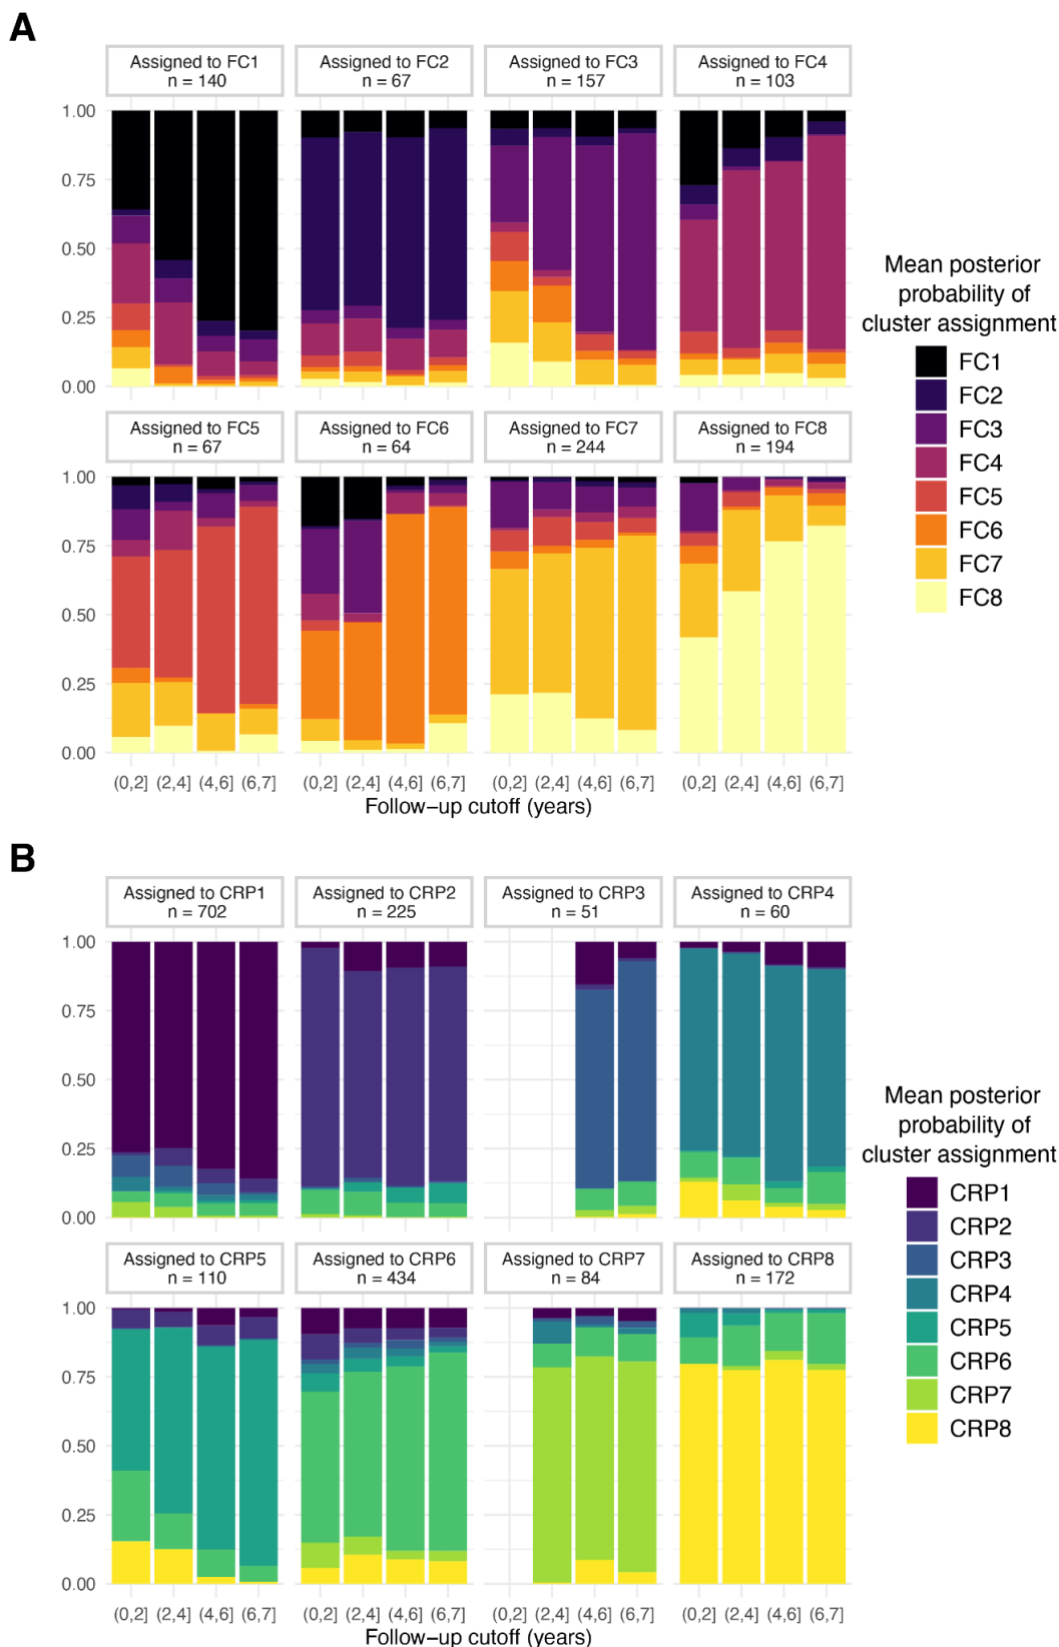

349  
 350 *Figure 5. Exploration of cluster assignment uncertainty for A) faecal calprotectin (FC) and B) CRP*  
 351 *clusters. LCMM assigns individuals to the cluster with the highest estimated probability. For*

352 *individuals assigned to a given cluster, bars show the average probability of cluster assignment to*  
353 *each possible cluster. Results are stratified according to follow-up length, defined as the time*  
354 *difference between diagnosis and the last available biomarker measurement (FC or CRP for A) and*  
355 *B), respectively). Clusters are ordered from lowest (FC1 and CRP1) to highest (FC8 and CRP8)*  
356 *cumulative inflammatory burden, with adjacent clusters coloured sequentially in the plots for FC (black*  
357 *to yellow) and CRP (blue to yellow).*

## 358 Uncertainty in cluster assignments

359 In the FC analysis, with the exception of FC2, cluster assignments were on average  
360 more uncertain for subjects with a short follow-up ([Figure 5](#) (A)). This is particularly the  
361 case for FC clusters that share similar earlier trends. For example, individuals  
362 assigned to FC1 (rapid FC normalisation) had a low average probability of being  
363 assigned to FC8 (consistently high FC) and vice-versa, even for those with a short  
364 follow-up. This is not the case when comparing FC3 and FC6, both of which capture  
365 similar FC trajectories within the first two years. Indeed, those assigned to FC6 with  
366 less than two years of follow-up also have, on average, a high probability of being  
367 assigned to FC3. On average, cluster assignments were less uncertain in the CRP  
368 analysis, even for individuals with a short follow-up ([Figure 5](#) (B)). This is expected as  
369 CRP clusters are associated with more distinct early trajectories.

## 370 Comparison of FC and CRP clustering

371 Overall, all FC clusters were well represented amongst the 808 subjects included in  
372 both analyses (*overlap cohort*), but CRP8 was underrepresented (~27% of CRP8 was  
373 in the overlap cohort vs ~46% elsewhere; [Figure S26](#)). When comparing FC and CRP  
374 clustering in the overlap cohort, there was little agreement ([Figure 6](#) (A)). Whilst most  
375 subjects in FC1 (71.6%) were also in CRP1 or CRP2, this relationship was not mirrored  
376 as 81.2% of subjects in the latter two clusters were assigned to substantially different  
377 FC clusters. However, CRP8 did overlap with elevated FC as the vast majority of  
378 subjects in this cluster (80.8%) were assigned to either FC7 or FC8. For the 451 CD  
379 subjects in the overlap cohort, largely similar patterns were observed ([Figure 6](#) (B)).  
380 For the 276 UC subjects, a substantial proportion of FC7 (45.1%) were assigned to  
381 CRP1 ([Figure 6](#) (C)), perhaps reflecting the characteristic where UC patients are less  
382 likely to mount an abnormal CRP response than CD patients<sup>21</sup>.

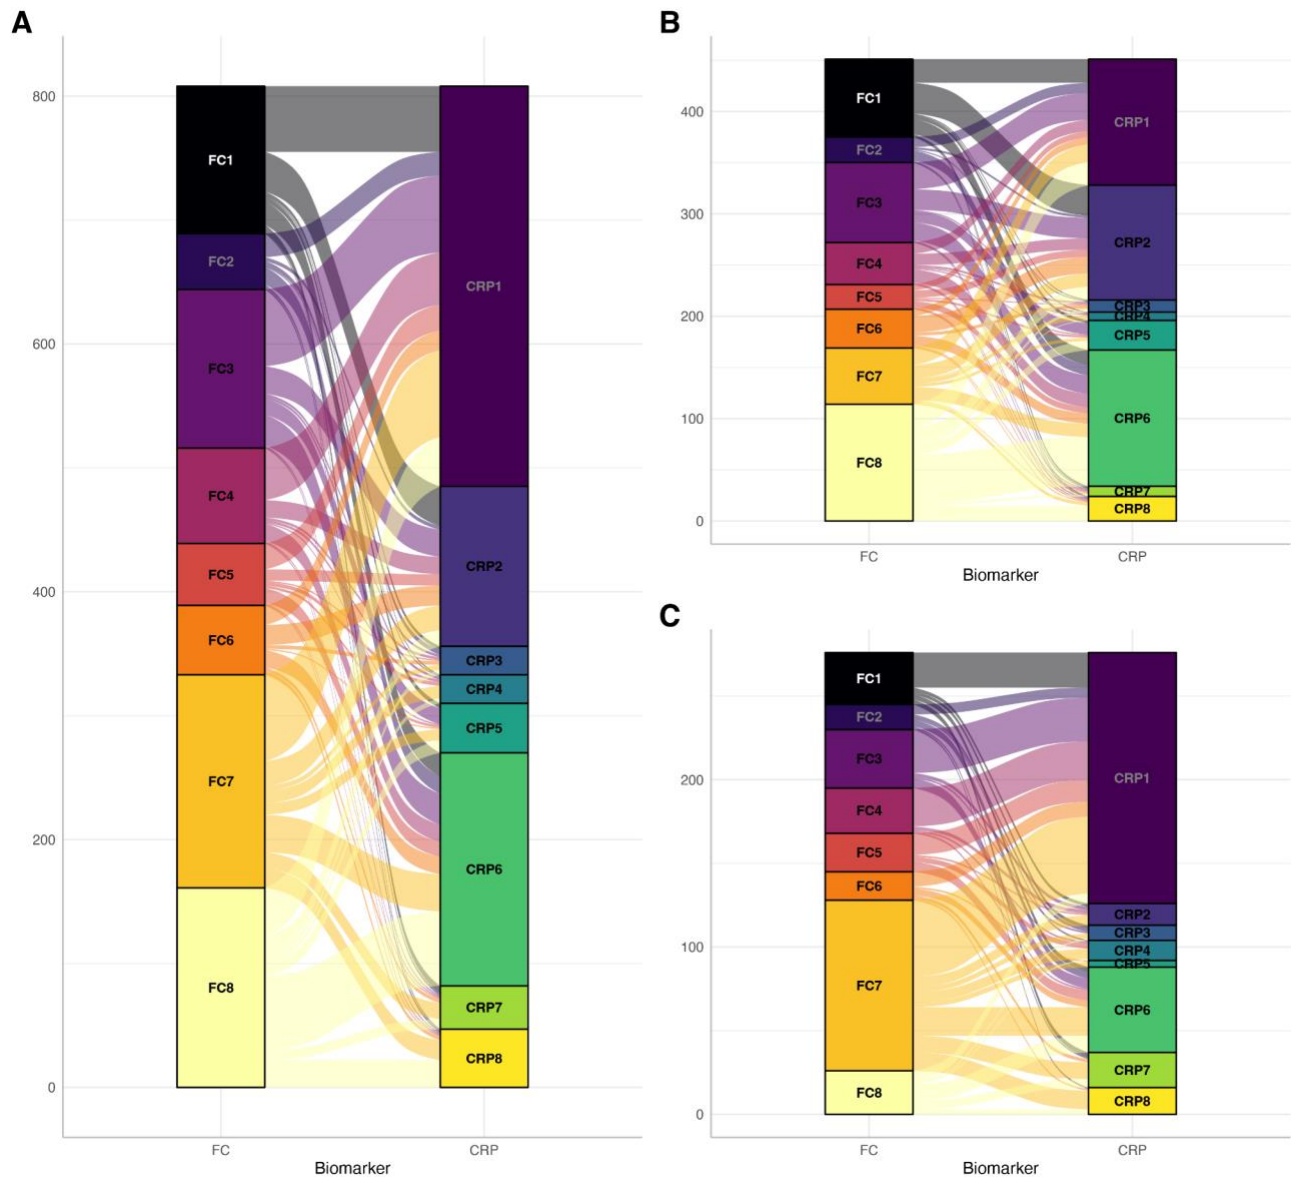

383

384

385

386

387

388

*Figure 6. Comparison between faecal calprotectin (FC) and processed CRP for models with chosen specification (three NCS) assuming eight clusters. Results are reported based on the overlap cohort, consisting of 808 subjects included in both the FC and CRP analysis. (A) all subjects; (B) Crohn's disease; and (C) ulcerative colitis. Each segment denotes the size of the cluster whilst the alluvial segments connecting the nodes visualises the number of subjects shared between clusters.*

389

## Discussion

390

391

392

393

We have characterised IBD behaviour using long-term longitudinal trends of objective inflammatory markers routinely collected for clinical care. Our model has uncovered, in a large IBD cohort, eight clusters with distinct inflammatory profiles based on FC and CRP, respectively. Our data highlights the heterogeneity of the disease course,

394 and present a novel approach for understanding real-world patterns of inflammatory  
395 activity in IBD patients. For the first time, we are capturing the dynamic nature of the  
396 disease in a more biologically nuanced way than traditional behaviour endpoints such  
397 as treatment escalation, surgery and “Montreal progression”. Moreover, this  
398 represents a marked shift from the traditional symptom-based behaviour profiles  
399 exemplified by the IBSEN cohorts over a decade ago.<sup>9,10</sup>

400

401 This study builds on our earlier proof-of-concept work, where we first demonstrated  
402 the feasibility of using long-term individualised profiles of FC to cluster IBD patients  
403 with CD.<sup>15</sup> In our previous analysis we identified four distinct FC clusters: one cluster  
404 with persistently high FC (non-remitters) and three clusters with different downward  
405 longitudinal trends. Here, we expand upon this by considering a substantially larger  
406 IBD cohort (FC cohort, n=1036; CRP cohort, n=1838), with longer follow-up, not  
407 excluding patients based on indicators of disease severity, and also including patients  
408 with UC or IBDU. In addition, we modelled CRP. This has generated results with  
409 greater representativeness across IBD phenotypes, uncovering more granular  
410 structure with eight distinct FC clusters rather than four. Whilst the modelling  
411 suggested further partitioning of the FC data was possible ([Figure S5](#), [Figure S7 \(A\)](#)),  
412 we selected the eight-cluster model as a parsimonious choice that captured the key  
413 inflammatory patterns ([Figure 2](#)). Notably, the CRP data also partitioned into eight  
414 distinct clusters. Together, the clusters broadly fall into four patterns of inflammatory  
415 behaviour mirroring those recognised by gastroenterologists managing IBD patients  
416 (i) rapid remitters (FC1 and CRP2), (ii) delayed remitters (FC3, FC7 and CRP5), (iii)  
417 relapsing-remitters (FC4-6 and CRP4 and CRP7), and (iv) non-remitters (FC8 and  
418 CRP6 and CRP8). These classifications provide new insights into the inflammatory  
419 course of IBD patients.

420

421 We observed broadly poor agreement between FC and CRP clusters, although there  
422 was overlap amongst those at the varying ends of the inflammatory spectrum with FC1  
423 and FC2 correlating with CRP1 and CRP2 (rapid remitters with low cumulative  
424 inflammatory burden), and FC7 and FC8 correlating with CRP6-8 (non-remitters with  
425 high cumulative inflammatory burdens). Although, the lack of overlap between the two  
426 is not surprising. CRP is a marker of systemic inflammation, whilst FC is more specific  
427 for detecting inflammation at a mucosal level. Hence, why both biomarkers are

428 complimentary when monitoring patients with IBD. Studies have also shown that a  
429 proportion of IBD patients will have lower CRP values at diagnosis,<sup>22</sup> as is seen in  
430 CRP1 which is significantly enriched for UC cases.

431

432 We observed several important observations regarding cluster assignment. All IBD  
433 subtypes featured in each cluster, however cluster assignment was unevenly  
434 distributed across CD, UC and IBDU (Figures [S9](#) and [S20](#)). In CD, although patients  
435 with L4 disease were less represented in FC1 and FC2 there was no association with  
436 ileal versus colonic disease location. Males were slightly overrepresented in the FC8  
437 cluster, which is characterised by persistently elevated values. Interestingly, in the  
438 recent SEXEII study, they observed male patients with UC were more likely to have  
439 extensive colonic involvement and abdominal surgery, which may account for this  
440 finding.<sup>23</sup> CRP cluster membership was also associated with smoking and older age,  
441 with both more likely to have higher inflammatory burdens.

442

443 Multiple lines of evidence, including the recent PROFILE study,<sup>24</sup> have clearly  
444 demonstrated improved disease control with and outcomes in Crohn's patients  
445 receiving early advanced therapy. As such, we anticipated that the biggest driver of  
446 inflammatory patterns over time would be advanced therapies and that this effect  
447 would be more pronounced in CD versus UC especially given the era of our cohort.  
448 Indeed, rates of advanced therapy use were not homogenous across clusters or IBD  
449 subtypes. Overall, in the FC cohort, advanced therapies were used in 49.6% of CD  
450 patients of which 47.7% started AT in the first year. In FC1, similar rates of advanced  
451 therapies were used for Crohn's patients, however they were used earlier, suggesting  
452 their positive benefit in rapidly inducing and maintaining remission. Rates of advanced  
453 therapy prescriptions for patients with CD in FC8 (persistently high levels of  
454 inflammatory behaviour) were similar, but started later in the disease course, which  
455 may have negatively affected the ability to bring about remission of disease. This  
456 cluster may also represent a more refractory group of patients, with a higher risk  
457 phenotype. Whilst this may provide additional support for the use of early advanced  
458 therapy, a causal interpretation of these effects is not possible in this study, which is  
459 based on observational data. Additional work with alternative cohorts where treatment  
460 assignment is randomised is planned.

461 Our study also highlights the importance of using a probabilistic approach to account  
462 for uncertainty in cluster assignments. Indeed, we observed higher uncertainty for  
463 subjects with a shorter longitudinal follow-up, particularly for FC clusters (Figure 5). In  
464 such cases, we cannot confidently assign individuals to a specific cluster. Instead,  
465 cluster assignment probabilities are sometimes evenly split across multiple clusters,  
466 mostly between those with similar earlier behaviour and inflammatory burdens. This  
467 effect is less prominent in CRP cluster assignments, partly due to the more distinct  
468 early trajectories observed across CRP clusters. As such, we anticipate that a  
469 multivariate approach which simultaneously considers other biomarkers of disease  
470 activity, such as haemoglobin, albumin, and platelet count, may further increase the  
471 robustness of cluster assignments. Such analysis may also consider pre-diagnostic  
472 biomarker measurements, following the recent observations in Danish registry data,<sup>25</sup>  
473 as well as metabolomics, genetics or microbiome data to inform cluster assignments.  
474 Critically, this study is limited to data generated in a single health board in Scotland.  
475 As such, independent validation of the identified longitudinal clusters will be necessary  
476 before clinical implementation and to better understand the associations between  
477 cluster assignment and disease phenotyping. Furthermore, there are limitations  
478 associated with the use of observational data. Beyond advanced therapy use, the  
479 frequency and amount of biomarker measurements is likely to be higher for those with  
480 a more severe disease, and very mild cases may be excluded from our cohort.  
481 Moreover, FC and CRP clusters cannot be directly used in a prognostic way. Indeed,  
482 future work is needed to assess associations between clusters and IBD related  
483 complications (such as steroid use, hospitalisations and surgery) but also non-  
484 conventional complications related to a high cumulative inflammatory burden, such as  
485 major cardiovascular adverse events, neuropsychiatric illness, and malignancy. Such  
486 analyses will ultimately support the development of a low cost clinical support tool to  
487 help deliver precision medicine to patients with IBD.

488 Classifying patients by their inflammatory behaviour may better inform therapy  
489 decisions, including timing of advanced therapy, as well as monitoring and follow-up  
490 requirements. This is a paradigm shift in thinking about disease behaviour compared  
491 with the previous symptom based profiles first reported by the IBSEN cohorts.  
492 Moreover, this approach - rooted in data that is widely available in clinical settings<sup>26</sup>  
493 and probabilistic modelling- paves the way for predictive analytics integrated into a

494 clinical support tool for population wide risk stratification and individual patient level  
495 prognostication and treatment.

## 496 Data sharing statement

497 As the data collected for this study has been derived from unconsented patient data,  
498 it is not possible to share subject-level data with external entities. Detailed summary  
499 level data is available online at <https://vallejosgroup.github.io/Lothian-IBDR>. The  
500 code used to conduct the analysis is also publicly available  
501 (<https://github.com/VallejosGroup/Lothian-IBDR>).

## 502 Author contributions

503 CAV, CWL, and NCC were involved in conceptualising the study. CRB, SO, ATE, GRJ,  
504 and NP curated the data. NCC and CAV implemented computer code, tested existing  
505 code components, and conducted the formal analysis and visualisation. The original  
506 draft was written by NCC, NP, ATE, CMR, CWL and CAV with all authors involved in  
507 reviewing and editing the manuscript. CWL and CAV provided supervisory support.

## 508 Competing interests

509 NP has served as a speaker for Janssen, Takeda and Pfizer. BG has acted as  
510 consultant to Galapagos and Abbvie and as speaker for Abbvie, Jansen, Takeda,  
511 Pfizer and Galapagos. G-RJ has served as a speaker for Takeda, Janssen, Abbvie,  
512 Fresenius and Ferring. CWL has acted as a speaker and/or consultant to AbbVie,  
513 Janssen, Takeda, Pfizer, Galapagos, GSK, Gilead, Vifor Pharma, Ferring, Dr Falk,  
514 BMS, Boehringer Ingelheim, Eli Lilly, Merck, Novartis, Sandoz, Celltrion, Cellgene,  
515 Amgen, Samsung Bioepis, Fresenius Kabi, Tillotts, Kuma Health, Trellus Health and  
516 Iterative Health. None of the other authors report any conflicts of interest.

## 517 Funding

518 CWL is funded by a UKRI (UK Research and Innovation) Future Leaders Fellowship  
519 'Predicting outcomes in IBD' (MR/S034919/1). G-RJ is funded by a Wellcome Trust  
520 Clinical Research Career Development Fellowship. NC-C was partially supported by  
521 the Medical Research Council and The University of Edinburgh via a Precision  
522 Medicine PhD studentship (MR/N013166/1).

## 523 References

524

- 525 1. Jones GR, Lyons M, Plevris N, et al. IBD prevalence in Lothian, Scotland,  
526 derived by capture–recapture methodology. *Gut*. 2019;68(11):1953-1960.  
527 doi:10.1136/gutjnl-2019-318936
- 528 2. Hamilton B, Green H, Heerasing N, et al. Incidence and prevalence of  
529 inflammatory bowel disease in Devon, UK. *Frontline Gastroenterol*.  
530 2021;12(6):461-470. doi:10.1136/flgastro-2019-101369
- 531 3. Cushing K, Higgins PDR. Management of Crohn disease: A review. *JAMA*.  
532 2021;325(1):69. doi:10.1001/jama.2020.18936
- 533 4. Gros B, Kaplan GG. Ulcerative colitis in adults: A review. *JAMA*.  
534 2023;330(10):951. doi:10.1001/jama.2023.15389
- 535 5. Zhou RW, Harpaz N, Itzkowitz SH, Parsons RE. Molecular mechanisms in colitis-  
536 associated colorectal cancer. *Oncogenesis*. 2023;12(1):48. doi:10.1038/s41389-  
537 023-00492-0
- 538 6. Kennedy NA, Jones GR, Plevris N, Patenden R, Arnott ID, Lees CW. Association  
539 between level of fecal calprotectin and progression of Crohn’s disease. *Clin*  
540 *Gastroenterol Hepatol*. 2019;17(11):2269-2276.e4.  
541 doi:10.1016/j.cgh.2019.02.017
- 542 7. Plevris N, Fulforth J, Lyons M, et al. Normalization of fecal calprotectin within 12  
543 months of diagnosis is associated with reduced risk of disease progression in  
544 patients with Crohn’s disease. *Clin Gastroenterol Hepatol*. 2021;19(9):1835-  
545 1844.e6. doi:10.1016/j.cgh.2020.08.022
- 546 8. Verstockt B, Noor NM, Marigorta UM, et al. Results of the Seventh Scientific  
547 Workshop of ECCO: Precision medicine in IBD—Disease outcome and response  
548 to therapy. *J Crohns Colitis*. 2021;15(9):1431-1442. doi:10.1093/ecco-jcc/jjab050
- 549 9. Solberg IC, Vatn MH, Høie O, et al. Clinical course in Crohn’s disease: Results of  
550 a Norwegian population-based ten-year follow-up study. *Clin Gastroenterol*  
551 *Hepatol*. 2007;5(12):1430-1438. doi:10.1016/j.cgh.2007.09.002
- 552 10. Solberg IC, Lygren I, Jahnsen J, et al. Clinical course during the first 10 years of  
553 ulcerative colitis: Results from a population-based inception cohort (IBSEN  
554 Study). *Scand J Gastroenterol*. 2009;44(4):431-440.  
555 doi:10.1080/00365520802600961
- 556 11. Peyrin-Biroulet L, Reinisch W, Colombel JF, et al. Clinical disease activity, C-  
557 reactive protein normalisation and mucosal healing in Crohn’s disease in the  
558 SONIC trial. *Gut*. 2014;63(1):88-95. doi:10.1136/gutjnl-2013-304984
- 559 12. Silverberg MS, Satsangi J, Ahmad T, et al. Toward an integrated clinical,  
560 molecular and serological classification of inflammatory bowel disease: Report of



- 561 a working party of the 2005 Montreal World Congress of Gastroenterology. *Can J*  
562 *Gastroenterol Hepatol.* 2005;19:5A-36A. doi:10.1155/2005/269076
- 563 13. Lennard-Jones JE. Classification of inflammatory bowel disease. *Scand J*  
564 *Gastroenterol.* 1989;24(sup170):2-6. doi:10.3109/00365528909091339
- 565 14. Sorlie P, Wei GS. Population-based cohort studies: Still relevant? *J Am Coll*  
566 *Cardiol.* 2011;58(19):2010-2013. doi:10.1016/j.jacc.2011.08.020
- 567 15. Constantine-Cooke N, Monterrubio-Gómez K, Plevris N, et al. Longitudinal fecal  
568 calprotectin profiles characterize disease course heterogeneity in Crohn's  
569 disease. *Clin Gastroenterol Hepatol.* 2023;21(11):2918-2927.e6.  
570 doi:10.1016/j.cgh.2023.03.026
- 571 16. Proust-Lima C, Philipps V, Liqueur B. Estimation of extended mixed models using  
572 latent classes and latent processes: The R package lcmm. *J Stat Softw.*  
573 2017;78(2):1-56. doi:10.18637/jss.v078.i02
- 574 17. Stoica P, Selen Y. Model-order selection: A review of information criterion rules.  
575 *IEEE Signal Process Mag.* 2004;21(4):36-47. doi:10.1109/MSP.2004.1311138
- 576 18. Proust-Lima C, Philipps V, Diakite A, Liqueur B. lcmm: extended mixed models  
577 using latent classes and latent processes. Published online 2021. [https://cran.r-](https://cran.r-project.org/package=lcmm)  
578 [project.org/package=lcmm](https://cran.r-project.org/package=lcmm)
- 579 19. Brunson JC. ggalluvial: layered grammar for alluvial plots. *J Open Source Softw.*  
580 2020;5(49):2017. doi:10.21105/joss.02017
- 581 20. Constantine-Cooke N. datefixR: fix really messy dates in R. Published online  
582 2024. doi:10.5281/zenodo.5655311
- 583 21. Clough J, Colwill M, Poullis A, Pollok R, Patel K, Honap S. Biomarkers in  
584 inflammatory bowel disease: A practical guide. *Ther Adv Gastroenterol.*  
585 2024;17:17562848241251600. doi:10.1177/17562848241251600
- 586 22. Henriksen M, Jahnsen J, Lygren I, et al. C-reactive protein: A predictive factor  
587 and marker of inflammation in inflammatory bowel disease. Results from a  
588 prospective population-based study. *Gut.* 2008;57(11):1518-1523.  
589 doi:10.1136/gut.2007.146357
- 590 23. Gargallo-Puyuelo CJ, Ricart E, Iglesias E, et al. Sex-related differences in the  
591 phenotype and course of inflammatory bowel disease: SEXEII study of ENEIDA.  
592 *Clin Gastroenterol Hepatol.* 2024;22(11):2280-2290.  
593 doi:10.1016/j.cgh.2024.05.013
- 594 24. Noor NM, Lee JC, Bond S, et al. A biomarker-stratified comparison of top-down  
595 versus accelerated step-up treatment strategies for patients with newly  
596 diagnosed Crohn's disease (PROFILE): A multicentre, open-label randomised  
597 controlled trial. *Lancet Gastroenterol Hepatol.* 2024;9(5):415-427.  
598 doi:10.1016/S2468-1253(24)00034-7

- 599 25. Vestergaard MV, Allin KH, Poulsen GJ, Lee JC, Jess T. Characterizing the pre-  
600 clinical phase of inflammatory bowel disease. *Cell Rep Med*. 2023;4(11):101263.  
601 doi:10.1016/j.xcrm.2023.101263
- 602 26. Markowitz F. All models are wrong and yours are useless: Making clinical  
603 prediction models impactful for patients. *Npj Precis Oncol*. 2024;8(1):54.  
604 doi:10.1038/s41698-024-00553-6
- 605

## 606 Supplemental display items

### 607 Table of contents

### 608 Supplemental figures

- 609 ● [Figure S1](#). Distribution of observation times for diagnostic FC
- 610 ● [Figure S2](#). Distribution of observation times for diagnostic CRP
- 611 ● [Figure S3](#). Illustration of how biomarker (faecal calprotectin or CRP)
- 612 observation times were adjusted based on time of diagnostic biomarker
- 613 observation
- 614 ● [Figure S4](#). Distribution of diagnostic biomarker measurements across the
- 615 study cohort
- 616 ● [Figure S5](#). Cluster trajectories obtained from LCMM assuming ten clusters
- 617 fitted to FC data
- 618 ● [Figure S6](#). Cluster trajectories obtained from LCMM assuming nine clusters
- 619 fitted to FC data
- 620 ● [Figure S7](#). Alluvial plot visualising cluster assignment as the number of
- 621 assumed clusters increases
- 622 ● **Associations with FC cluster membership**
- 623 ○ [Figure S8](#). Age and sex
- 624 ○ [Figure S9](#). IBD type
- 625 ○ [Figure S10](#). Smoking for CD subjects
- 626 ○ [Figure S11](#). Montreal location for CD subjects
- 627 ○ [Figure S12](#). L4 for CD subjects
- 628 ○ [Figure S13](#). Montreal behaviour for CD subjects
- 629 ○ [Figure S14](#). Perianal disease for CD subjects
- 630 ○ [Figure S15](#). Smoking for UC subjects
- 631 ○ [Figure S16](#). Montreal extent for UC subjects
- 632 ● [Figure S17](#). Cluster trajectories obtained from model assuming nine clusters
- 633 fitted to CRP data
- 634 ● [Figure S18](#). Cluster trajectories obtained from model assuming seven clusters
- 635 fitted to CRP data
- 636 ● **Associations with CRP cluster membership**

- 637 ○ [Figure S19](#). Age and sex
- 638 ○ [Figure S20](#). IBD type
- 639 ○ [Figure S21](#). Smoking for CD subjects
- 640 ○ [Figure S22](#). Montreal location for CD subjects
- 641 ○ [Figure S23](#). L4 for CD subjects
- 642 ○ [Figure S24](#). Montreal behaviour for CD subjects
- 643 ● [Figure S25](#). Time to first-line advanced therapy by CRP cluster assignment
- 644 ● [Figure S26](#). Proportion of individuals included in the overlap cohort by FC and
- 645 CRP cluster assignment

#### 646 Supplemental tables

- 647 ● [Table S1](#). Model statistics for models fitted to FC data
- 648 ● [Table S2](#). Model statistics for models fitted to CRP data

## 649 Supplemental figures

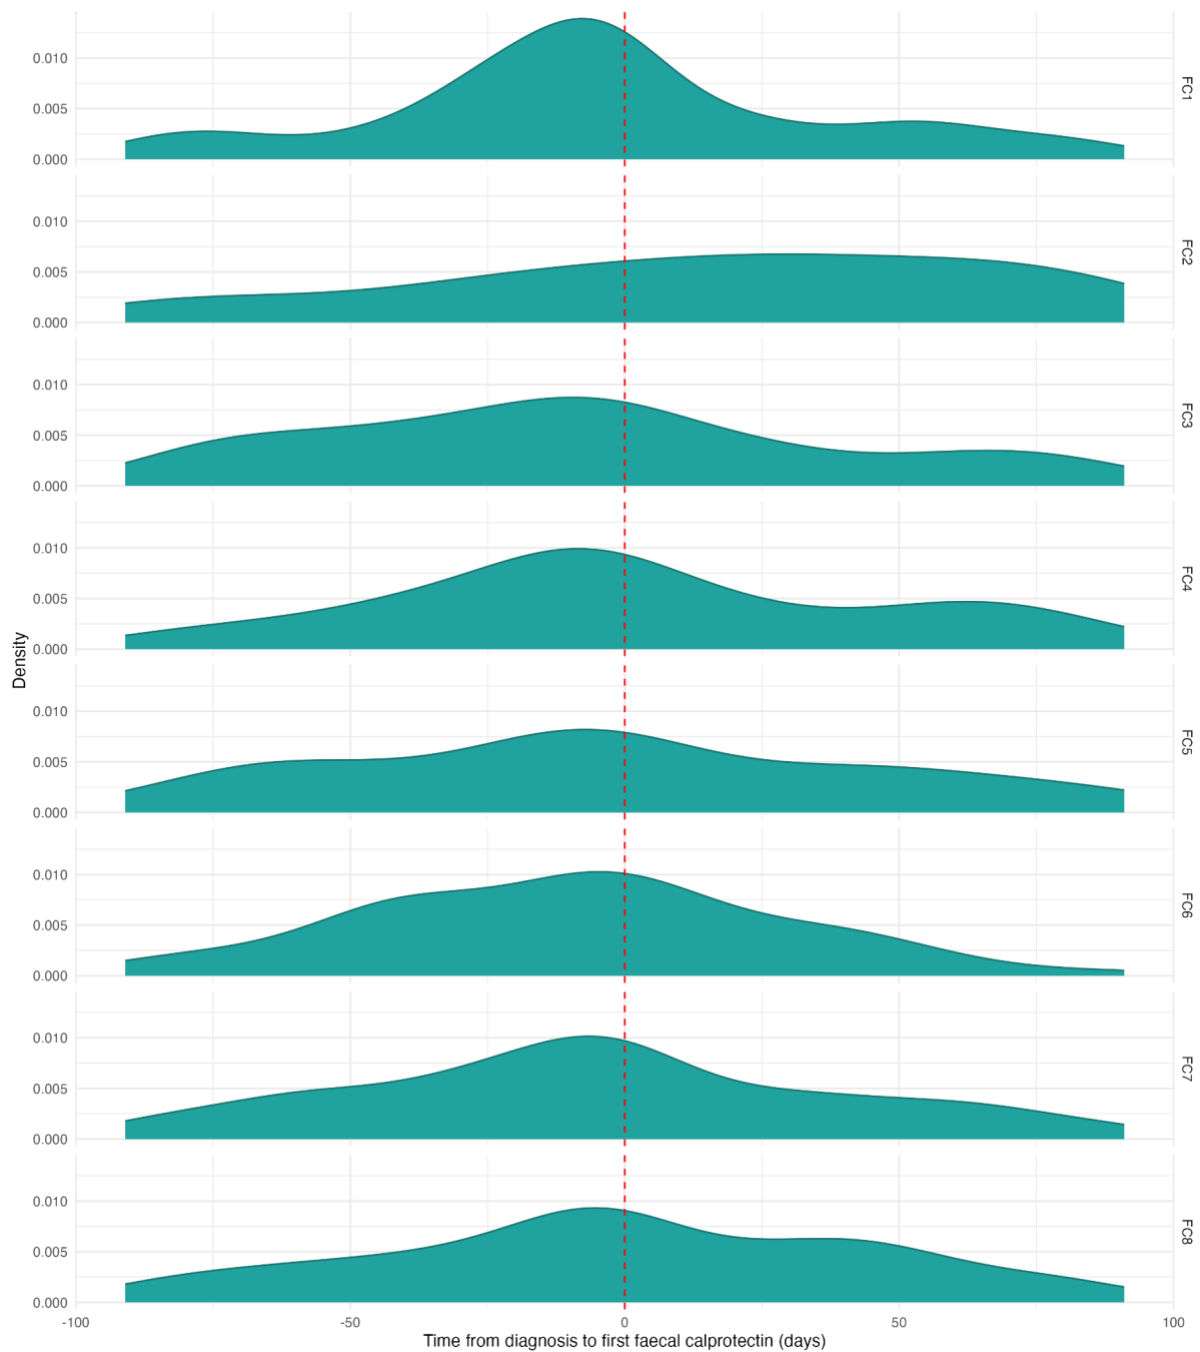

650

651

652

653

*Figure S1. Distribution of observation times for diagnostic faecal calprotectin (FC) relative to reported date of diagnosis for the study cohort. Stratified by FC cluster assignment. Diagnostic FC was defined as the first FC test within  $\pm 90$  days of diagnosis.*

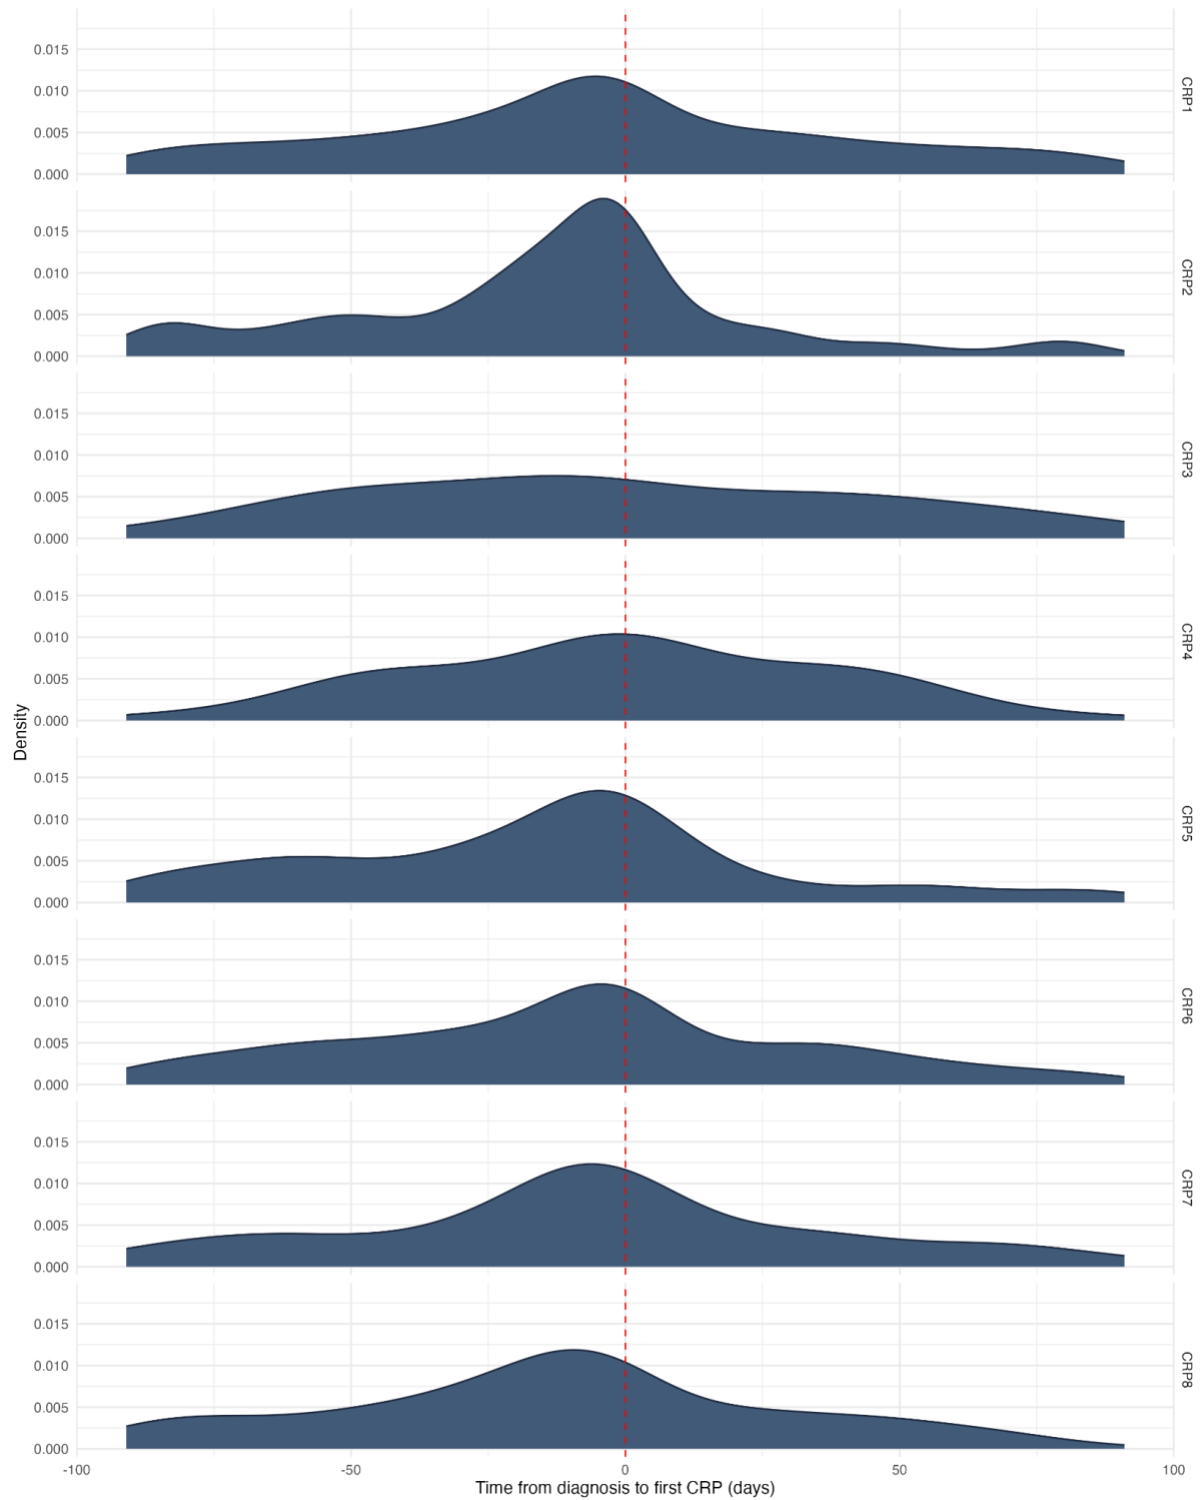

654

655

656

657

*Figure S2. Distribution of observation times for diagnostic C-reactive protein (CRP) relative to reported date of diagnosis for the study cohort. Stratified by CRP cluster assignment. Diagnostic CRP was defined as the first CRP test within  $\pm 90$  days of diagnosis.*

### Scenario 1:

First biomarker measurement within 90 days of reported date of diagnosis is *before* diagnosis

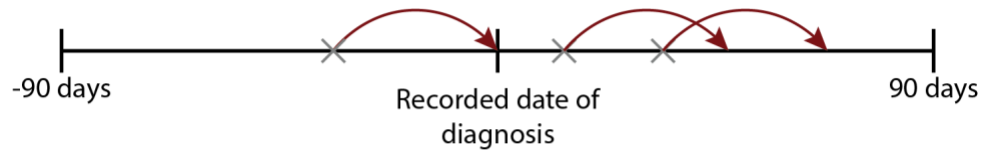

Biomarker observations are re-timed by the same amount so the first observation now corresponds to diagnosis

### Scenario 2:

First biomarker measurement within 90 days of reported date of diagnosis is *after* diagnosis

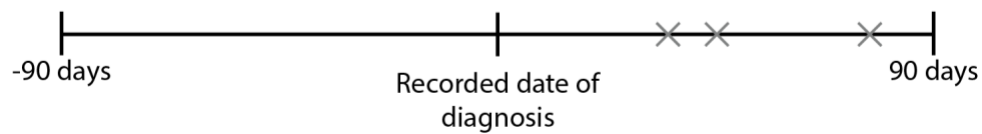

Biomarker observations are not re-timed

658  
659  
660  
661

Figure S3. Illustration of how biomarker (faecal calprotectin or CRP) observation times were adjusted depending on if the diagnostic observation was before or after the date of diagnosis recorded in electronic health records.

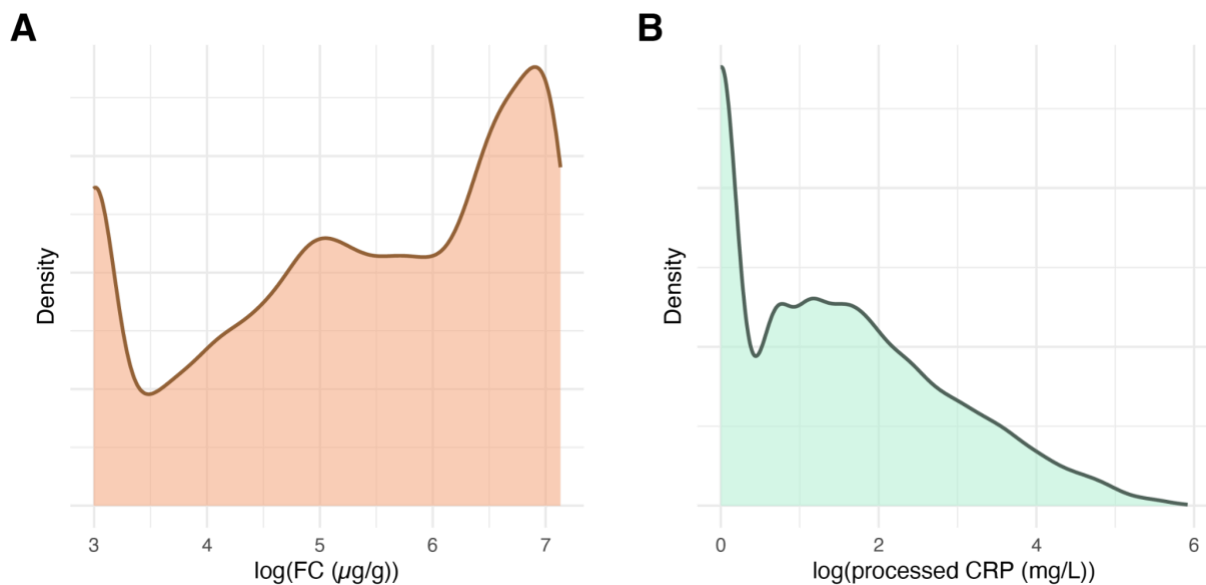

662  
663  
664  
665

Figure S4. Distribution of diagnostic biomarker measurements across the study cohort. (A) faecal calprotectin after applying a logarithmic transformation; (B) pre-processed (grouped into time intervals with the median used for multiple measurements) CRP after logarithmic transformation.

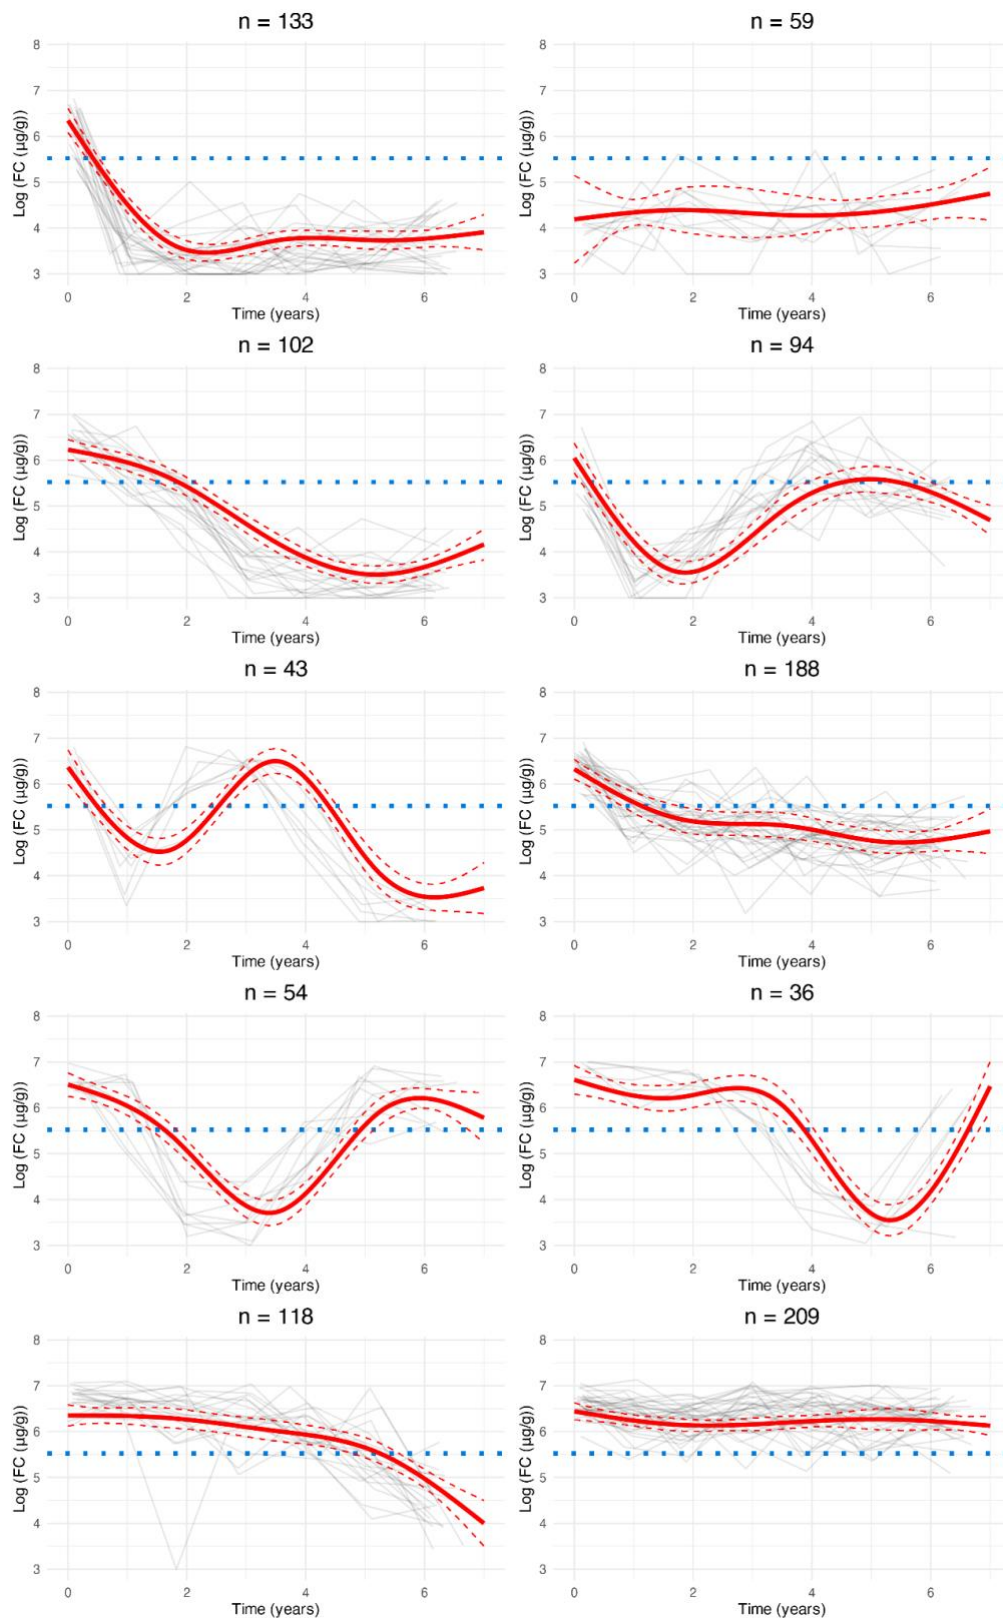

666  
667  
668  
669  
670

*Figure S5. Cluster trajectories obtained from LCMM assuming ten clusters fitted to faecal calprotectin data. Red lines indicate predicted mean cluster profiles with 95% confidence intervals. Dotted horizontal lines indicate  $\log(250\mu\text{g/g})$ . For visualisation purposes, pseudo subject-specific trajectories have been generated by amalgamating observations from groups of six subjects.*



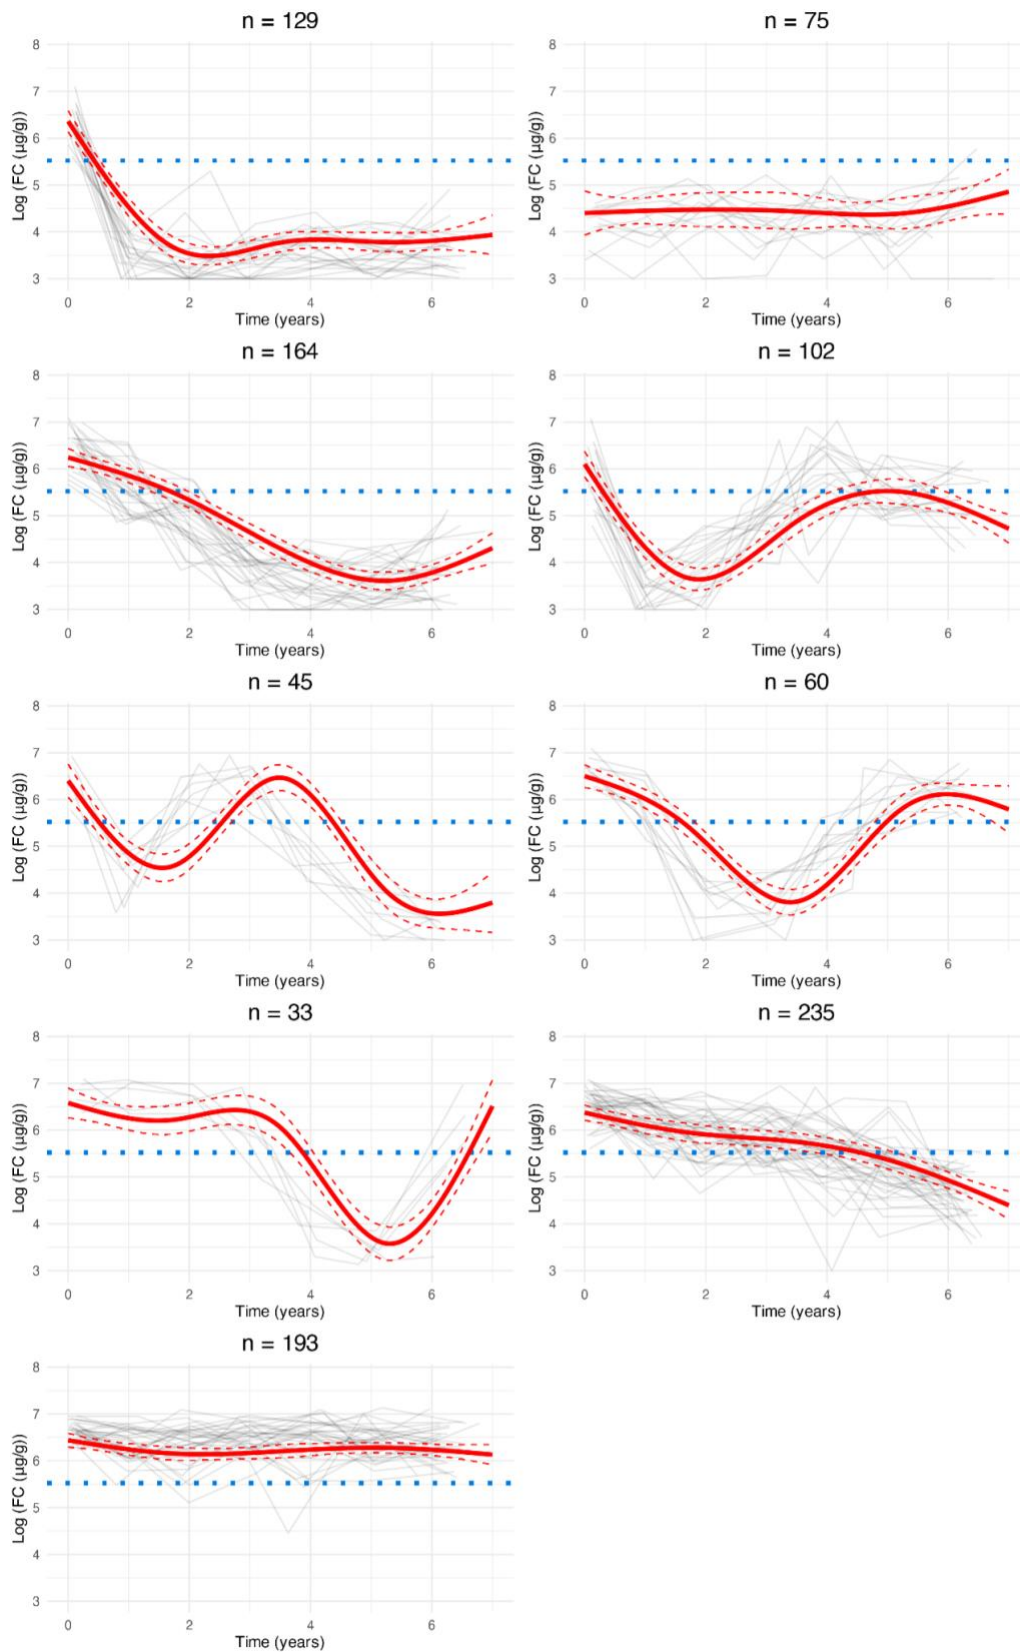

671

672

673

674

675

*Figure S6. Cluster trajectories obtained from LCMM assuming nine clusters fitted to faecal calprotectin data. Red lines indicate predicted mean cluster profiles with 95% confidence intervals. Dotted horizontal lines indicate  $\log(250\mu\text{g/g})$ . For visualisation purposes, pseudo subject-specific trajectories have been generated by amalgamating observations from groups of six subjects.*

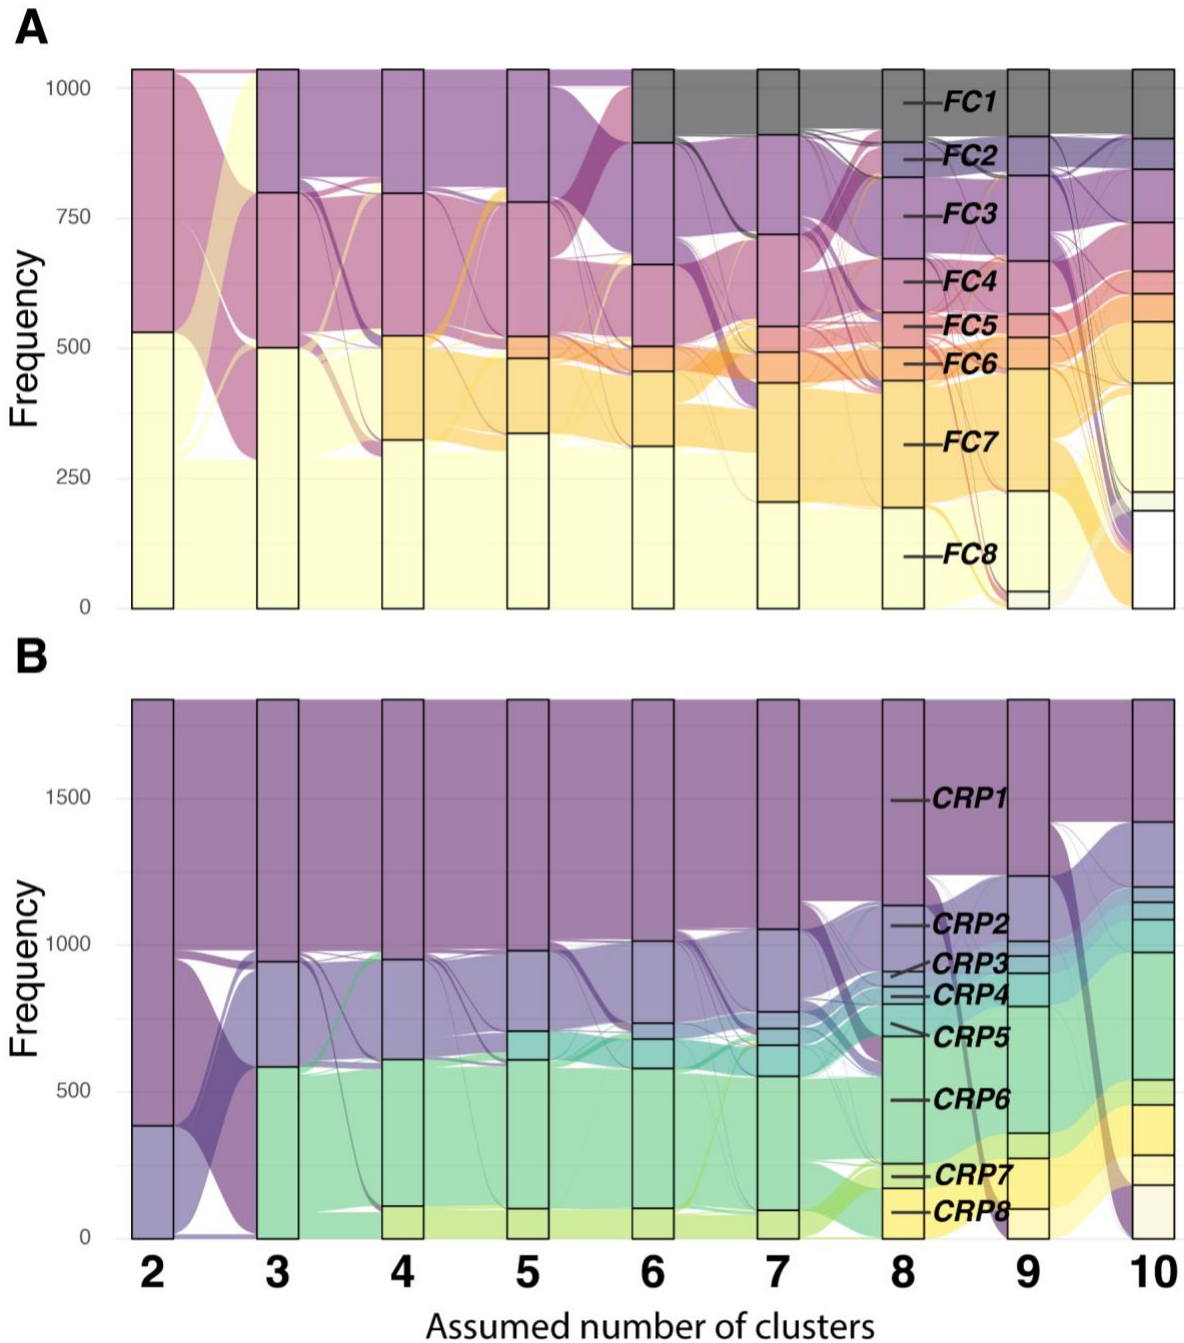

676

677

678

679

*Figure S7. Alluvial plot demonstrating how cluster assignment changes as the number of assumed clusters increases for the chosen models for (A) faecal calprotectin and (B) C-reactive protein. The clusters found by the 8-cluster models are labelled.*

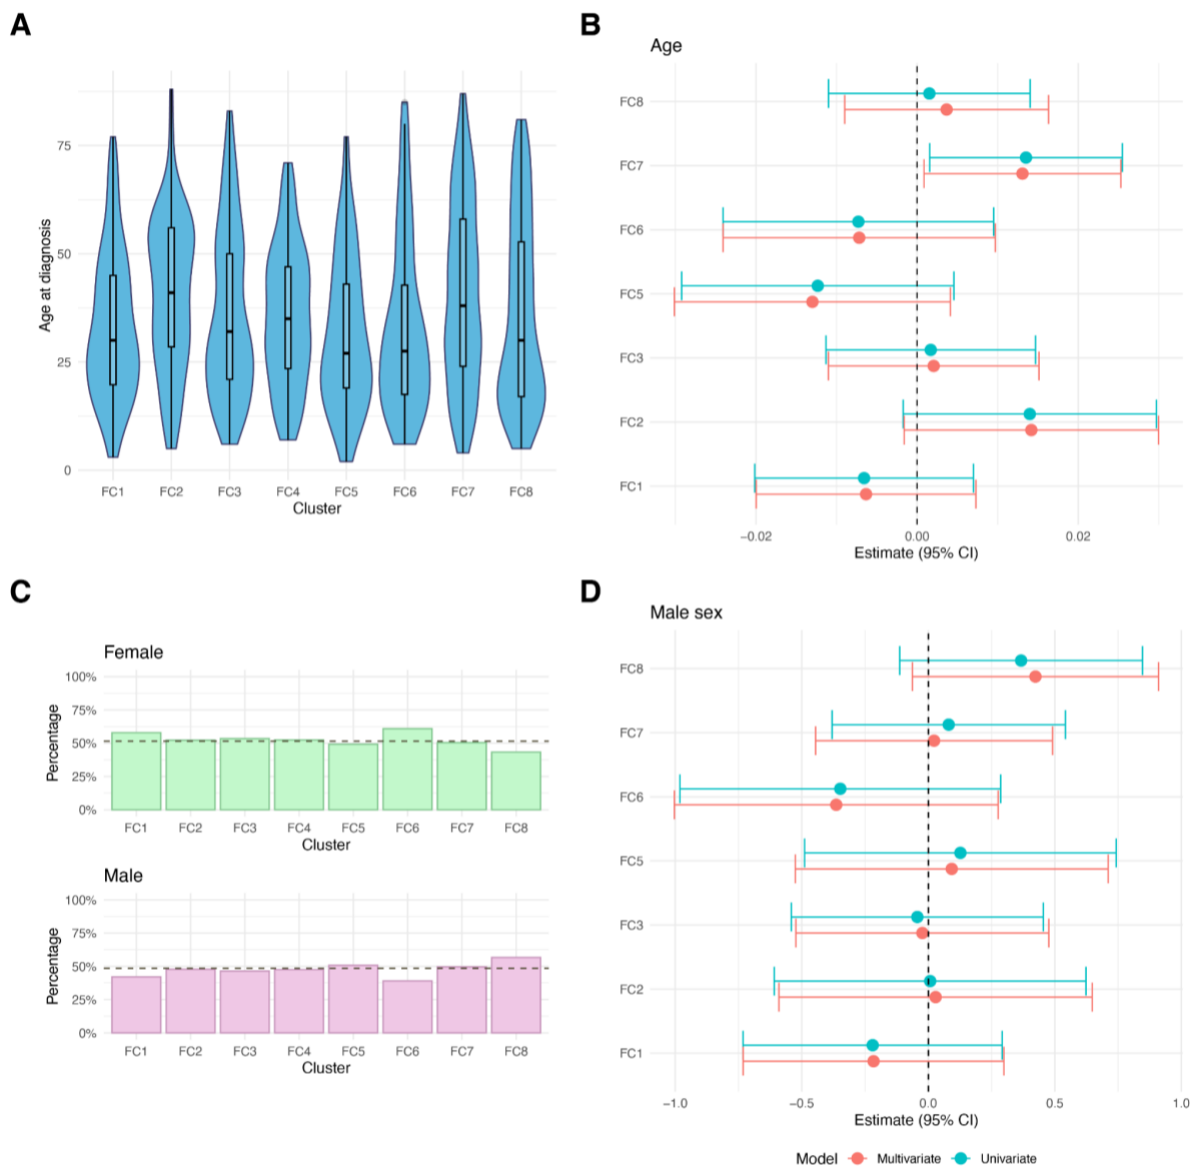

680  
681  
682  
683  
684  
685  
686  
687  
688  
689  
690  
691

Figure S8. (A) For each FC cluster, violin plots show the distribution of age at diagnosis across subjects, highlighting median and interquartile ranges. (B) Forest plot showing the estimated effect sizes and associated 95% confidence intervals for age in a multinomial logistic regression model that uses FC cluster assignment as outcome. (C) For each FC cluster, panels show the proportion of individuals with female and male sex. The dashed horizontal line represents overall proportions across the entire FC cohort. (D) Forest plot showing the estimated effect sizes and associated 95% confidence intervals for male sex versus females (baseline category) in a multinomial logistic regression model that uses FC cluster assignment as outcome. In (B) and (C), effect sizes are with respect to the reference cluster (in this case FC4). In both cases, the multivariate model includes age, sex and IBD type as covariates. The dashed vertical lines are used as a reference to indicate no effect.

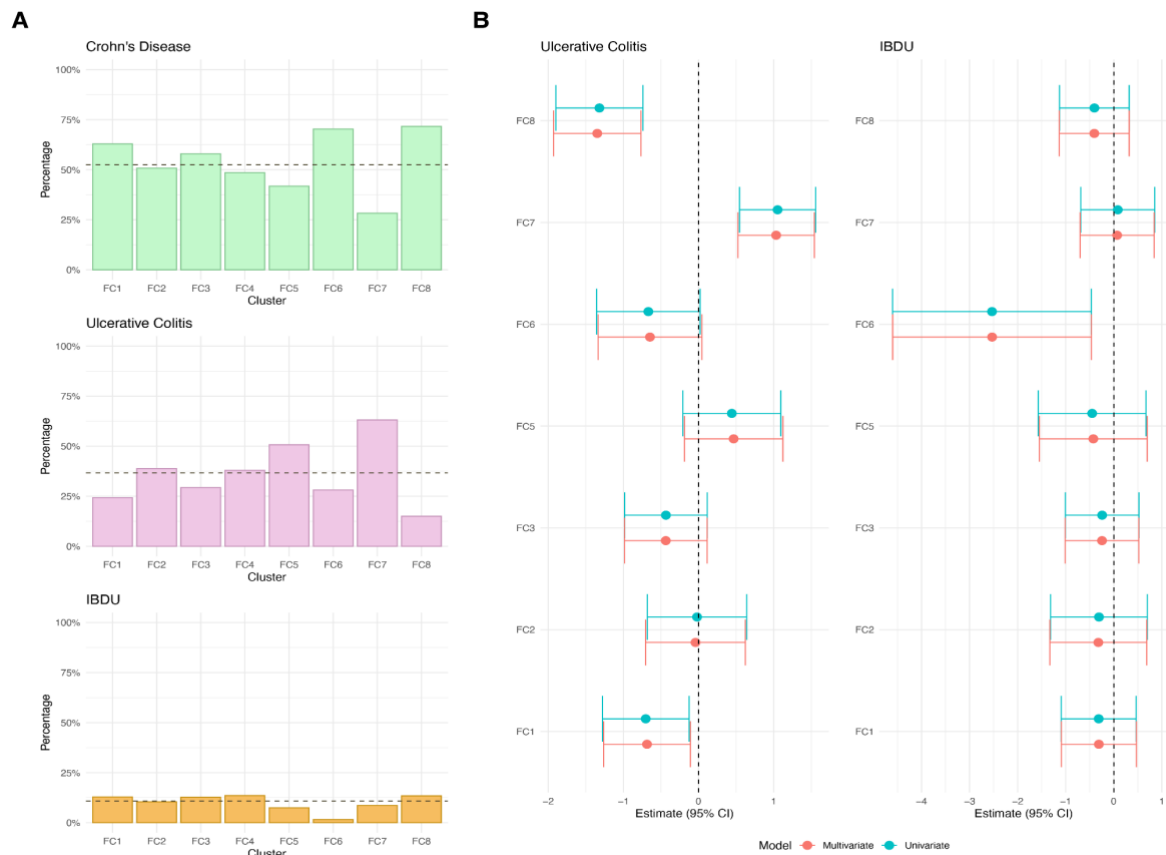

692  
693  
694  
695  
696  
697  
698  
699  
700

Figure S9. (A) For each FC cluster, panels show the proportion of individuals with Crohn's disease, ulcerative colitis and IBDU respectively. The dashed horizontal line represents overall proportions across the entire FC cohort. (B) Forest plot showing the estimated effect sizes and associated 95% confidence intervals for IBD type: ulcerative colitis and IBDU versus Crohn's disease (baseline category) in a multinomial logistic regression model that uses FC cluster assignment as outcome. Effect sizes are with respect to the reference cluster (in this case FC4). In both cases, the multivariate model includes age, sex and IBD type as covariates. The dashed vertical lines are used as a reference to indicate no effect.

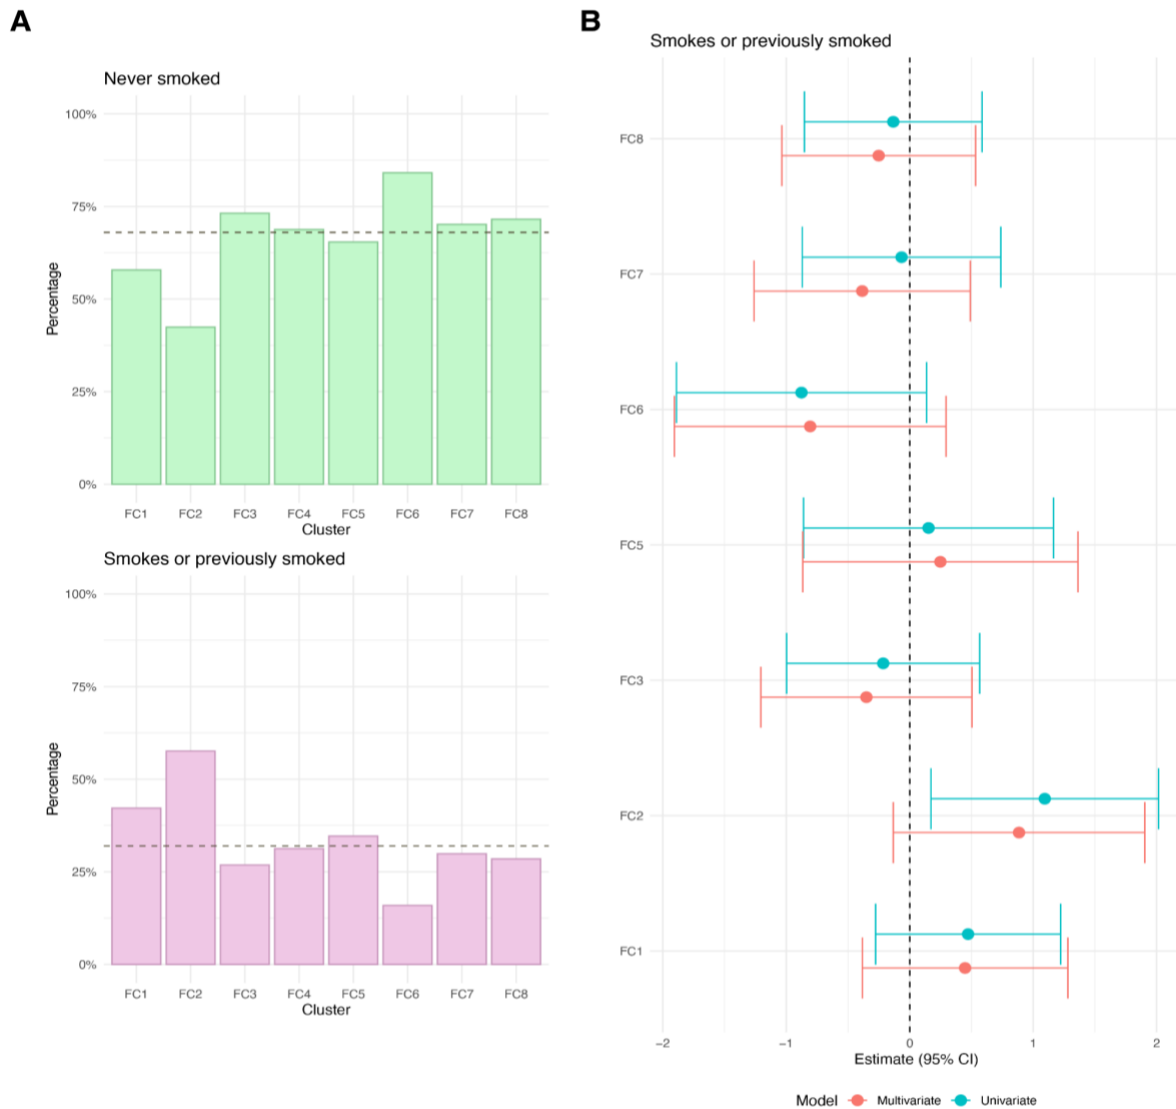

701  
702  
703  
704  
705  
706  
707  
708  
709  
710  
711  
712

Figure S10. Crohn's disease patients only. (A) For each FC cluster, panels show the proportion of individuals with smoking behaviour recorded as "no" (no and never) and "yes" (current or previously smoked) at diagnosis respectively. The dashed horizontal line represents overall proportions across the entire FC cohort. (B) Forest plot showing the estimated effect sizes and associated 95% confidence intervals for smoking: yes versus no (baseline category) in a multinomial logistic regression model that uses FC cluster assignment as outcome. Effect sizes are with respect to the reference cluster (in this case FC4). The multivariate model includes age, sex, smoking, Montreal location (L1, L2, L3), upper gastrointestinal inflammation (L4), perianal disease (yes, no) and Montreal behaviour (B1, B2/B3) as covariates. The dashed vertical lines are used as a reference to indicate no effect.

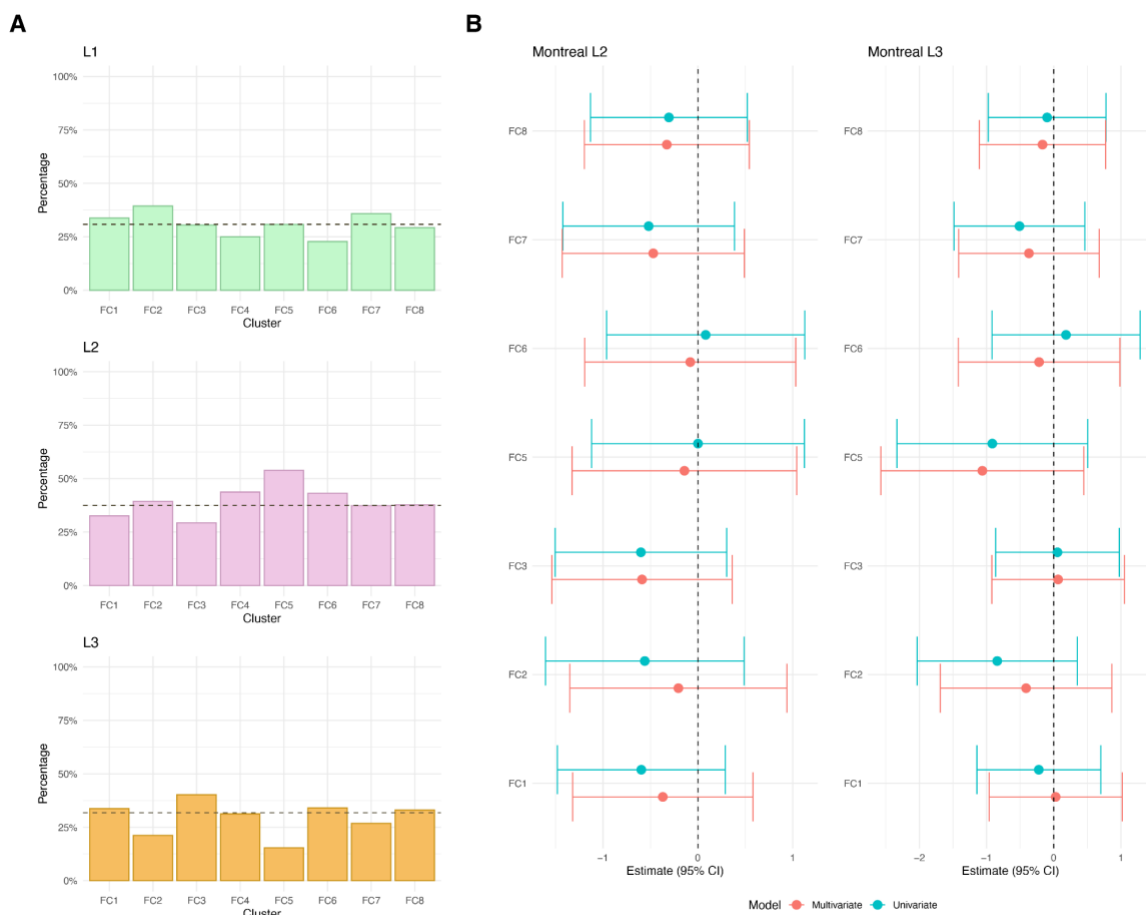

713

714

715

716

717

718

719

720

721

722

*Figure S11. Crohn's disease patients only. (A) For each FC cluster, panels show the proportion of individuals with Montreal Location recorded as L1, L2 and L3 respectively. The dashed horizontal line represents overall proportions across the entire FC cohort. (B) Forest plot showing the estimated effect sizes and associated 95% confidence intervals for Montreal Location: L2 and L3 versus L1 (baseline category) in a multinomial logistic regression model that uses FC cluster assignment as outcome. Effect sizes are with respect to the reference cluster (in this case FC4). The multivariate model includes age, sex, smoking, Montreal location (L1, L2, L3), upper gastrointestinal inflammation (L4), perianal disease (yes, no) and Montreal behaviour (B1, B2/B3) as covariates. The dashed vertical lines are used as a reference to indicate no effect.*

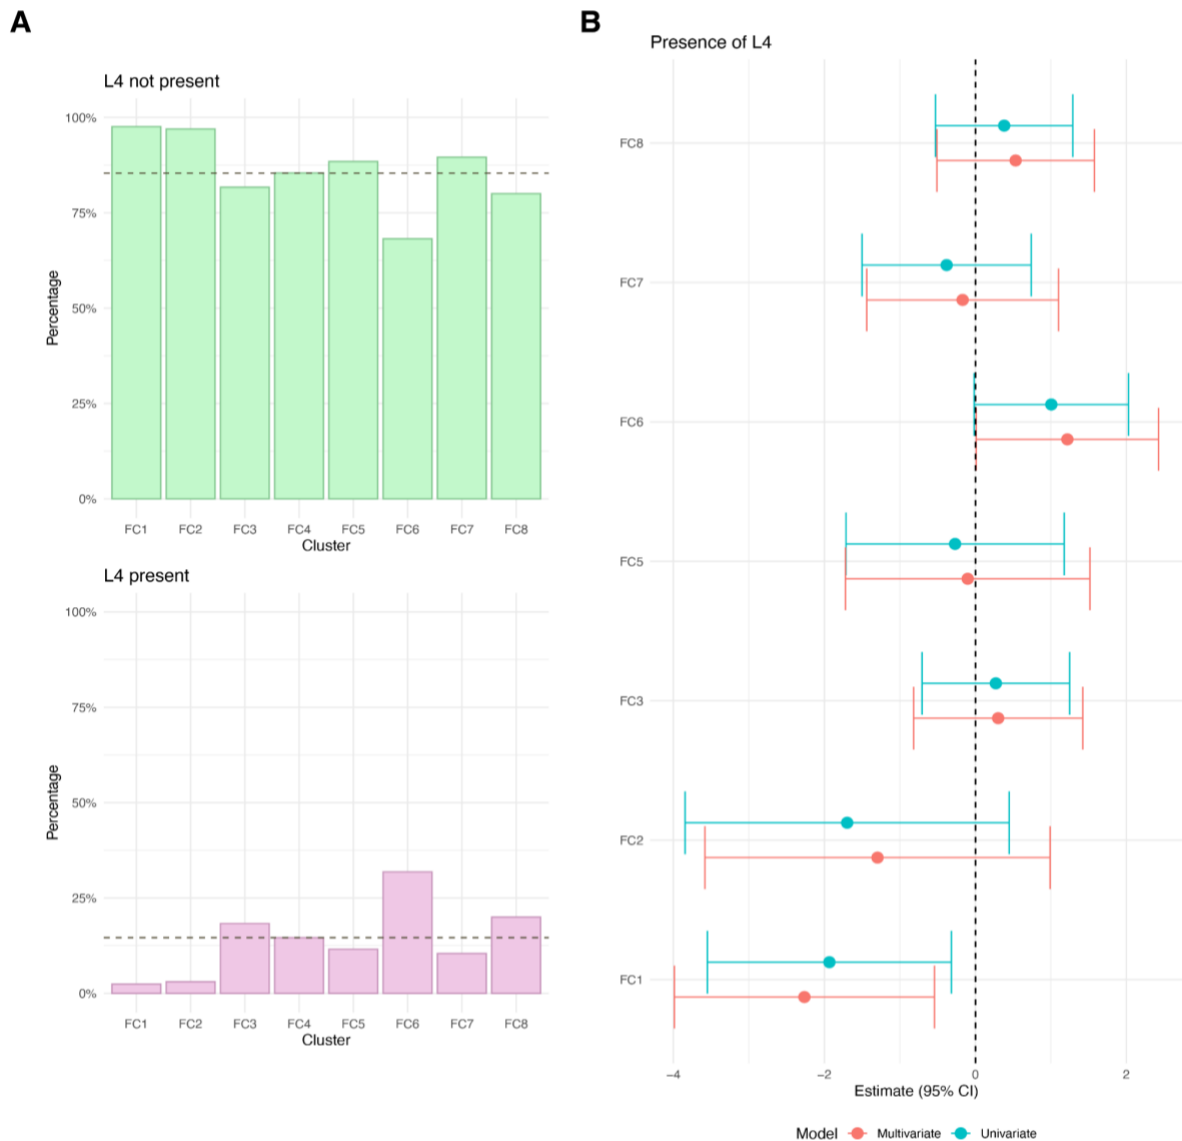

723  
724  
725  
726  
727  
728  
729  
730  
731  
732

*Figure S12 Crohn's disease patients only. (A) For each FC cluster, panels show the proportion of individuals with Montreal L4 (upper gastrointestinal inflammation), recorded as present or non present. The dashed horizontal line represents overall proportions across the entire FC cohort. (B) Forest plot showing the estimated effect sizes and associated 95% confidence intervals for L4: present versus not present (baseline category) in a multinomial logistic regression model that uses FC cluster assignment as outcome. Effect sizes are with respect to the reference cluster (in this case FC4). The multivariate model includes age, sex, smoking, Montreal location (L1, L2, L3), upper gastrointestinal inflammation (L4), perianal disease (yes, no) and Montreal behaviour (B1, B2/B3) as covariates. The dashed vertical lines are used as a reference to indicate no effect.*

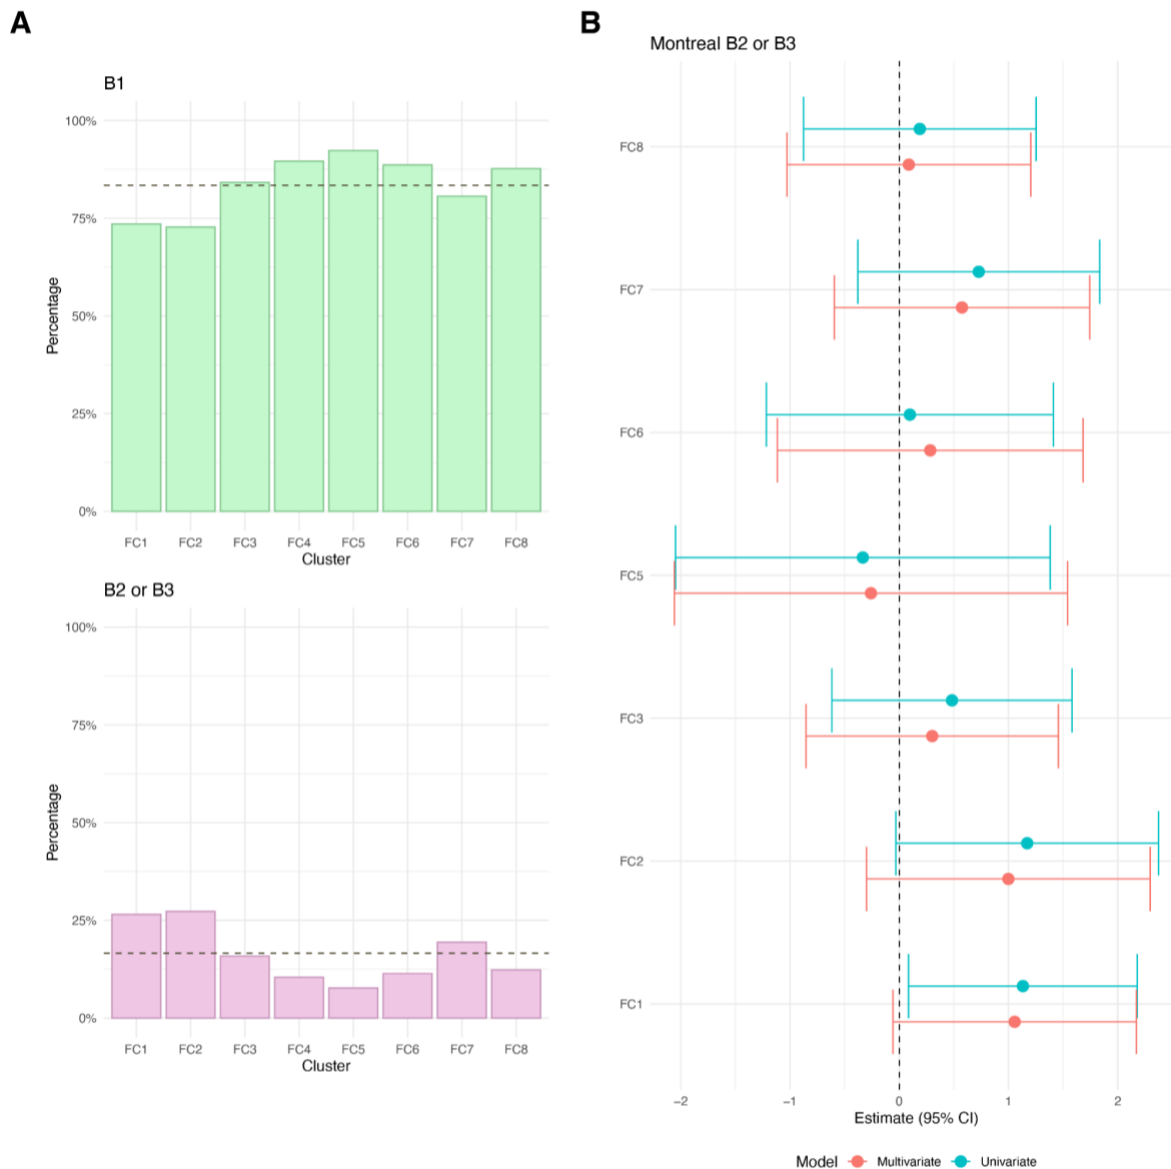

733

734

735 *Figure S13. Crohn's disease patients only. (A) For each FC cluster, panels show the proportion of*  
 736 *individuals with Montreal behaviour recorded as B1 or B2/B3 respectively. The dashed horizontal line*

737

738 *represents overall proportions across the entire FC cohort. (B) Forest plot showing the estimated*  
 739 *effect sizes and associated 95% confidence intervals for Montreal behaviour: B2/B3 versus B1*

740

741 *(baseline category) in a multinomial logistic regression model that uses FC cluster assignment as*  
 742 *outcome. Effect sizes are with respect to the reference cluster (in this case FC4). The multivariate*

743

744 *model includes age, sex, smoking, Montreal location (L1, L2, L3), upper gastrointestinal inflammation*  
 745 *(L4), perianal disease (yes, no) and Montreal behaviour (B1, B2/B3) as covariates. The dashed*

746

747 *vertical lines are used as a reference to indicate no effect.*



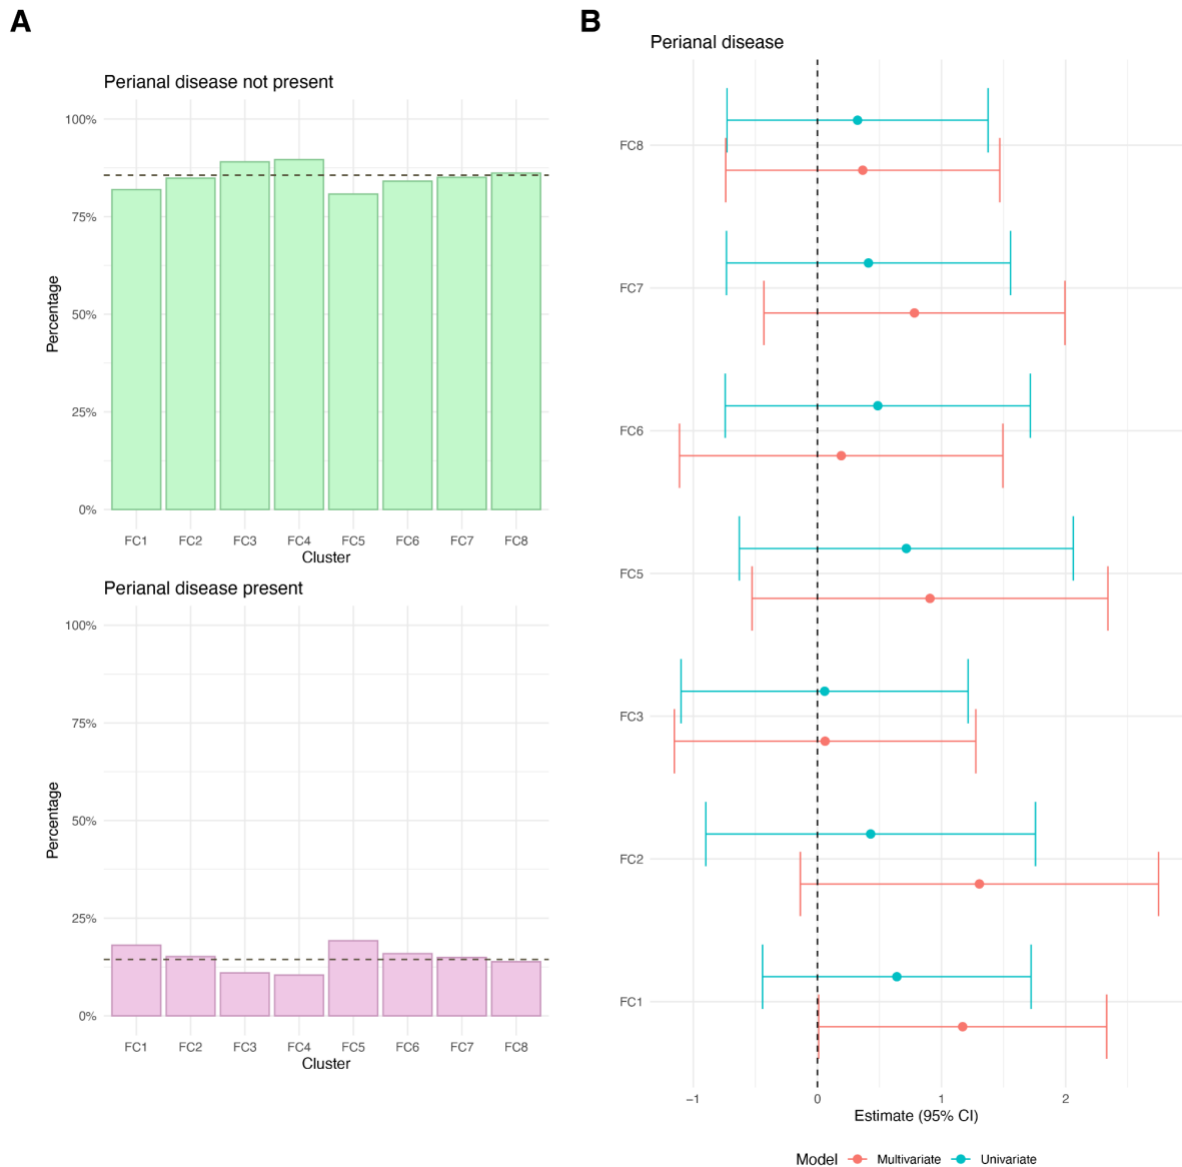

743

744

745

746

747

748

749

750

751

752

*Figure S14 Crohn's disease patients only. (A) For each FC cluster, panels show the proportion of individuals with perianal disease recorded as present or not present. The dashed horizontal line represents overall proportions across the entire FC cohort. (B) Forest plot showing the estimated effect sizes and associated 95% confidence intervals for perianal disease: present versus not present (baseline category) in a multinomial logistic regression model that uses FC cluster assignment as outcome. Effect sizes are with respect to the reference cluster (in this case FC4). The multivariate model includes age, sex, smoking, Montreal location (L1, L2, L3), upper gastrointestinal inflammation (L4), perianal disease (yes, no) and Montreal behaviour (B1, B2/B3) as covariates. The dashed vertical lines are used as a reference to indicate no effect.*

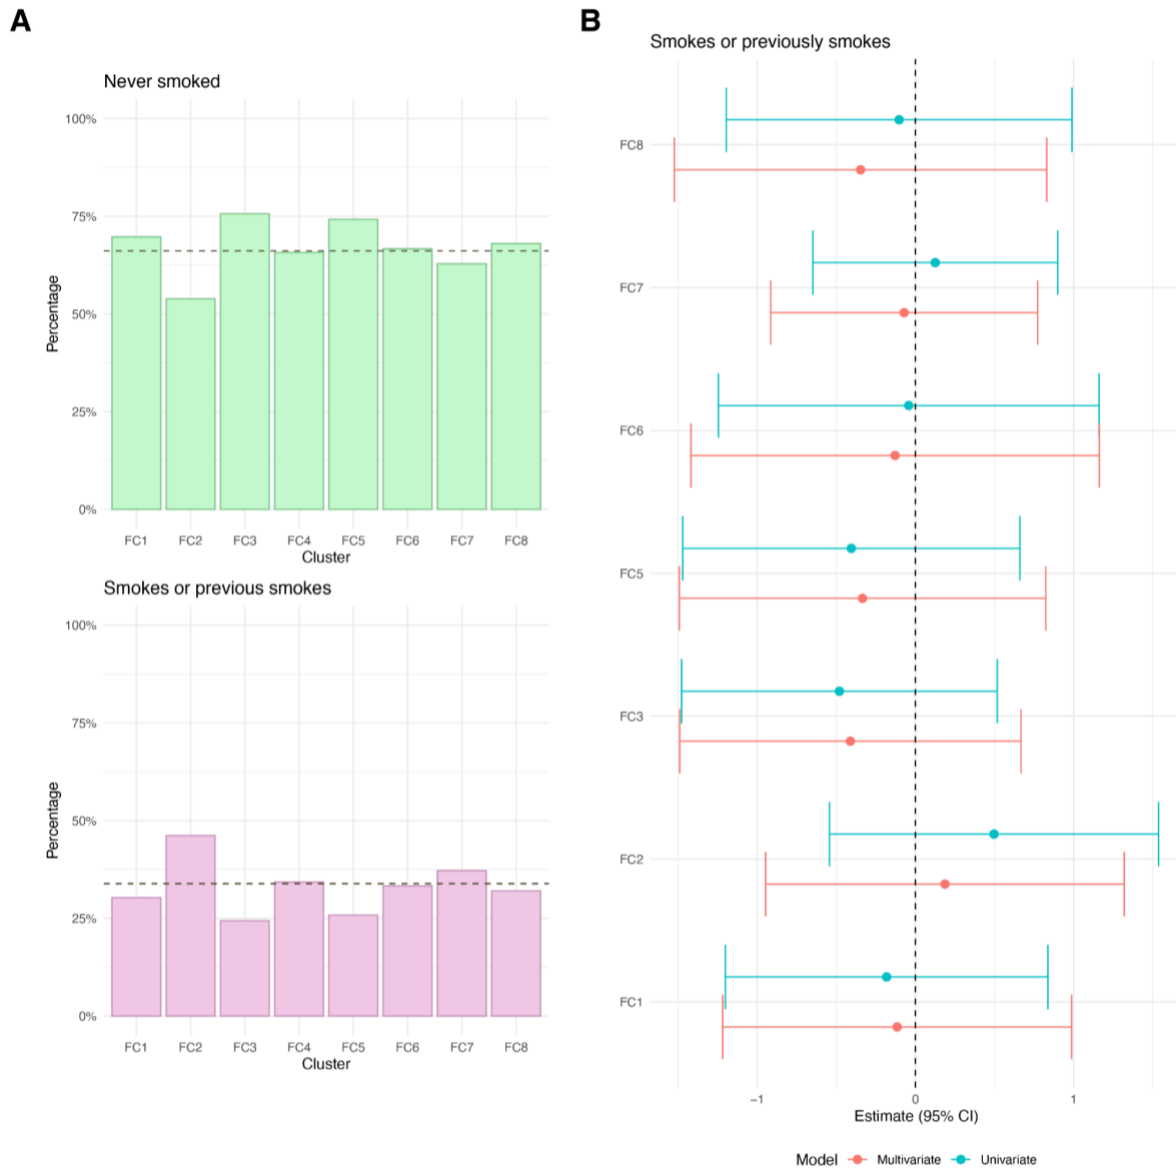

753  
754  
755  
756  
757  
758  
759  
760  
761  
762

Figure S15. Ulcerative colitis patients only. (A) For each FC cluster, panels show the proportion of individuals with smoking behaviour recorded as “no” (no and never) and “yes” (current or previously smoked) at diagnosis respectively. The dashed horizontal line represents overall proportions across the entire FC cohort. (B) Forest plot showing the estimated effect sizes and associated 95% confidence intervals for smoking: yes versus no (baseline category) in a multinomial logistic regression model that uses FC cluster assignment as outcome. Effect sizes are with respect to the reference cluster (in this case FC4). The multivariate model includes age, sex, smoking and Montreal extent (E1, E2, E3). The dashed vertical lines are used as a reference to indicate no effect.

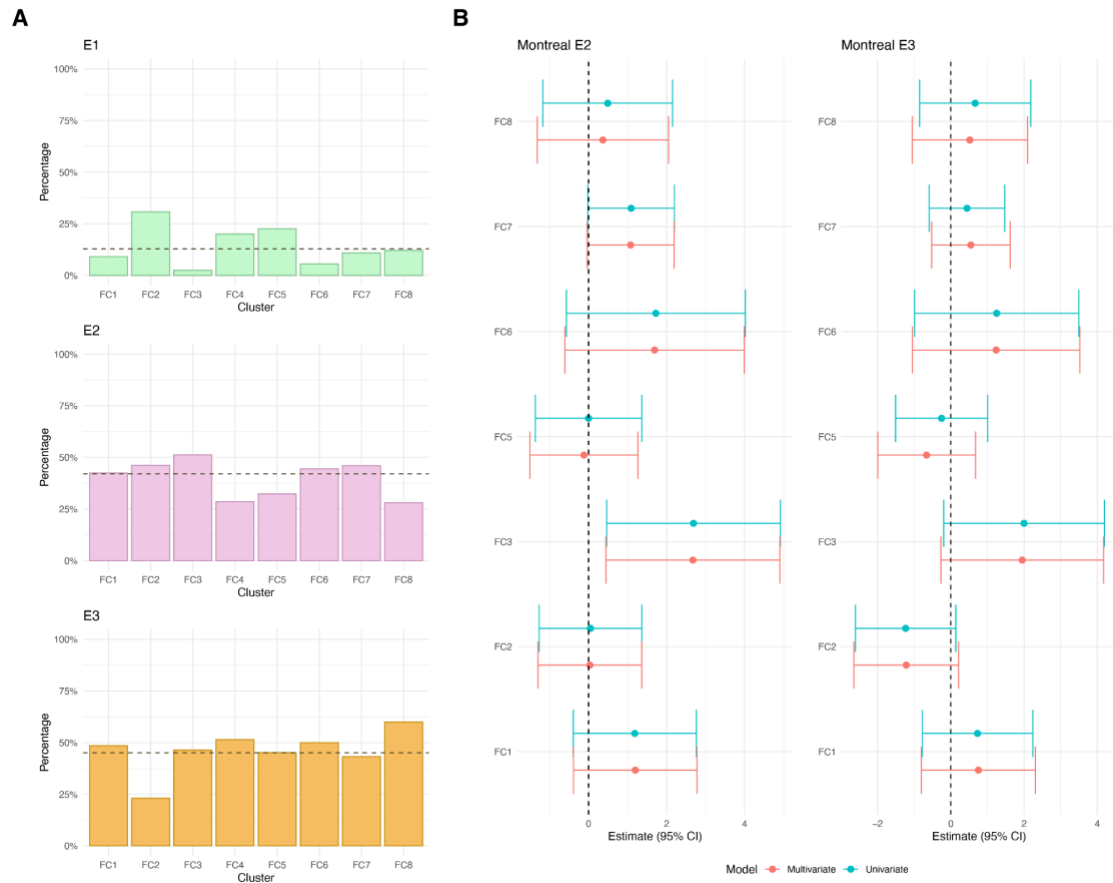

763  
764  
765  
766  
767  
768  
769  
770  
771

Figure S16. Ulcerative colitis patients only. (A) For each cluster, panels show the proportion of individuals with Montreal extent recorded as E1, E2 and E3 respectively. The dashed horizontal line represents overall proportions across the entire FC cohort. (B) Forest plot showing the estimated effect sizes and associated 95% confidence intervals for Montreal extent: E2 and E3 versus E1 (baseline category) in a multinomial logistic regression model that uses FC cluster assignment as outcome. Effect sizes are with respect to the reference cluster (in this case FC4). The multivariate model includes age, sex, smoking and Montreal extent (E1, E2, E3). The dashed vertical lines are used as a reference to indicate no effect.

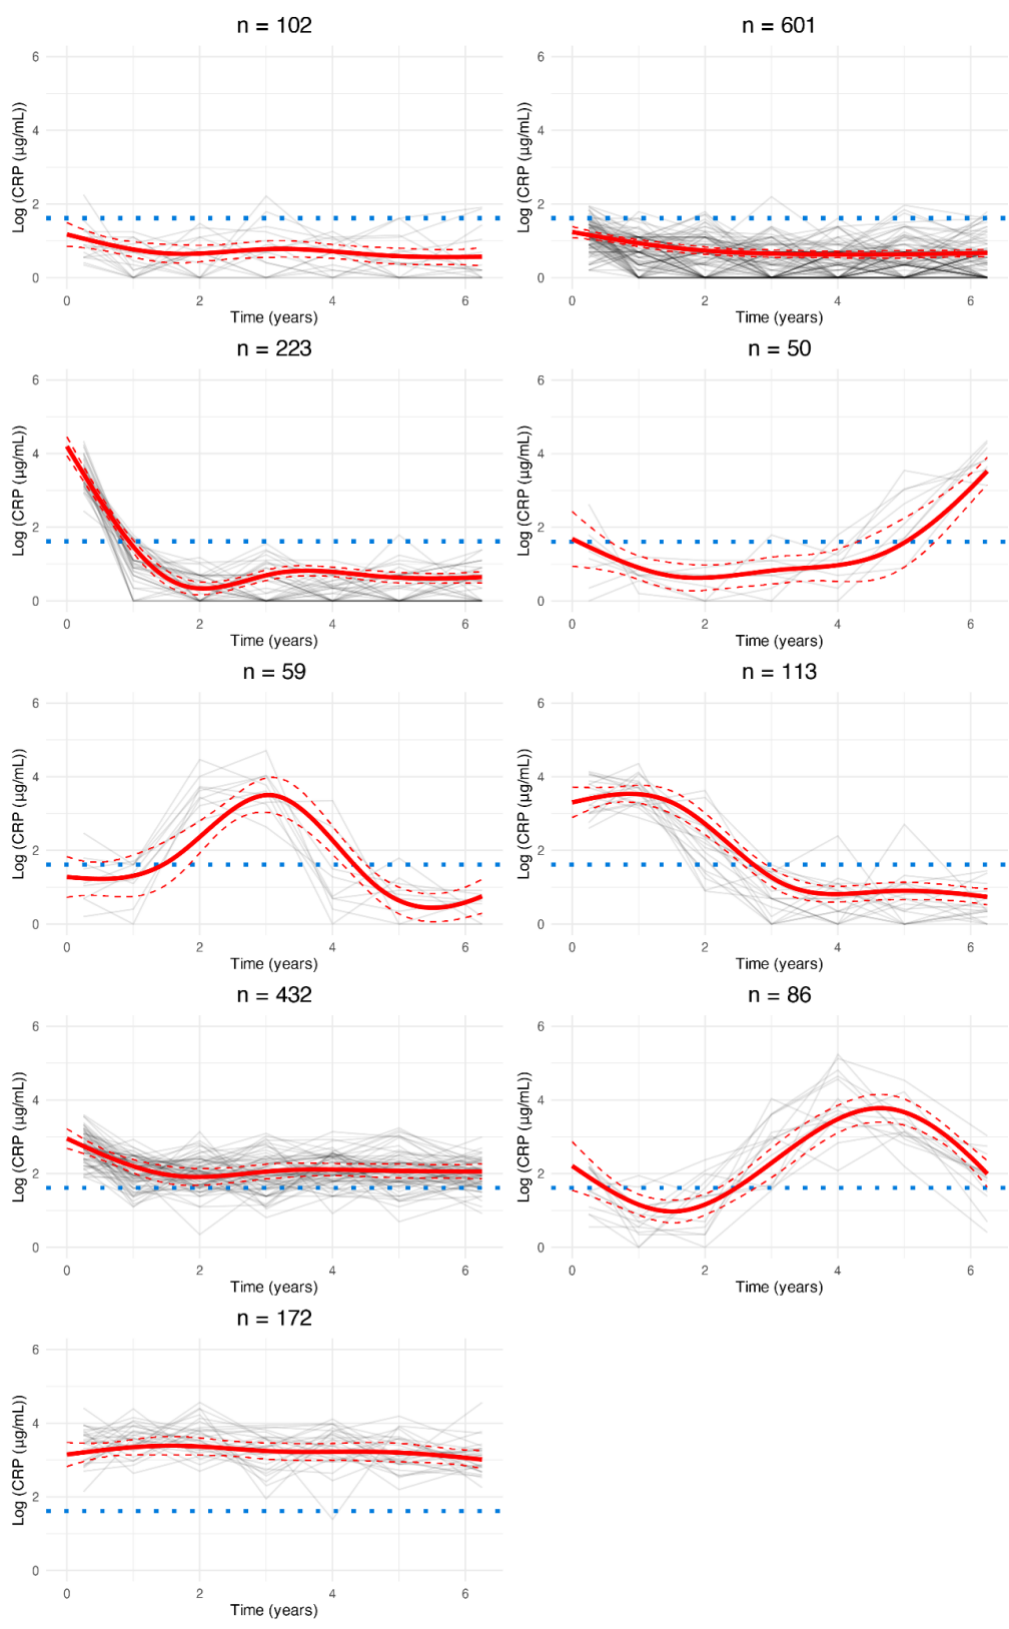

772  
773  
774  
775  
776

*Figure S17. Cluster trajectories obtained from LCMM assuming nine clusters fitted to C-reactive protein data. Red lines indicate predicted mean cluster profiles with 95% confidence intervals. Dotted horizontal lines indicate log(5µg/mL). For visualisation purposes, pseudo subject-specific trajectories have been generated by amalgamating observations from groups of six subjects.*

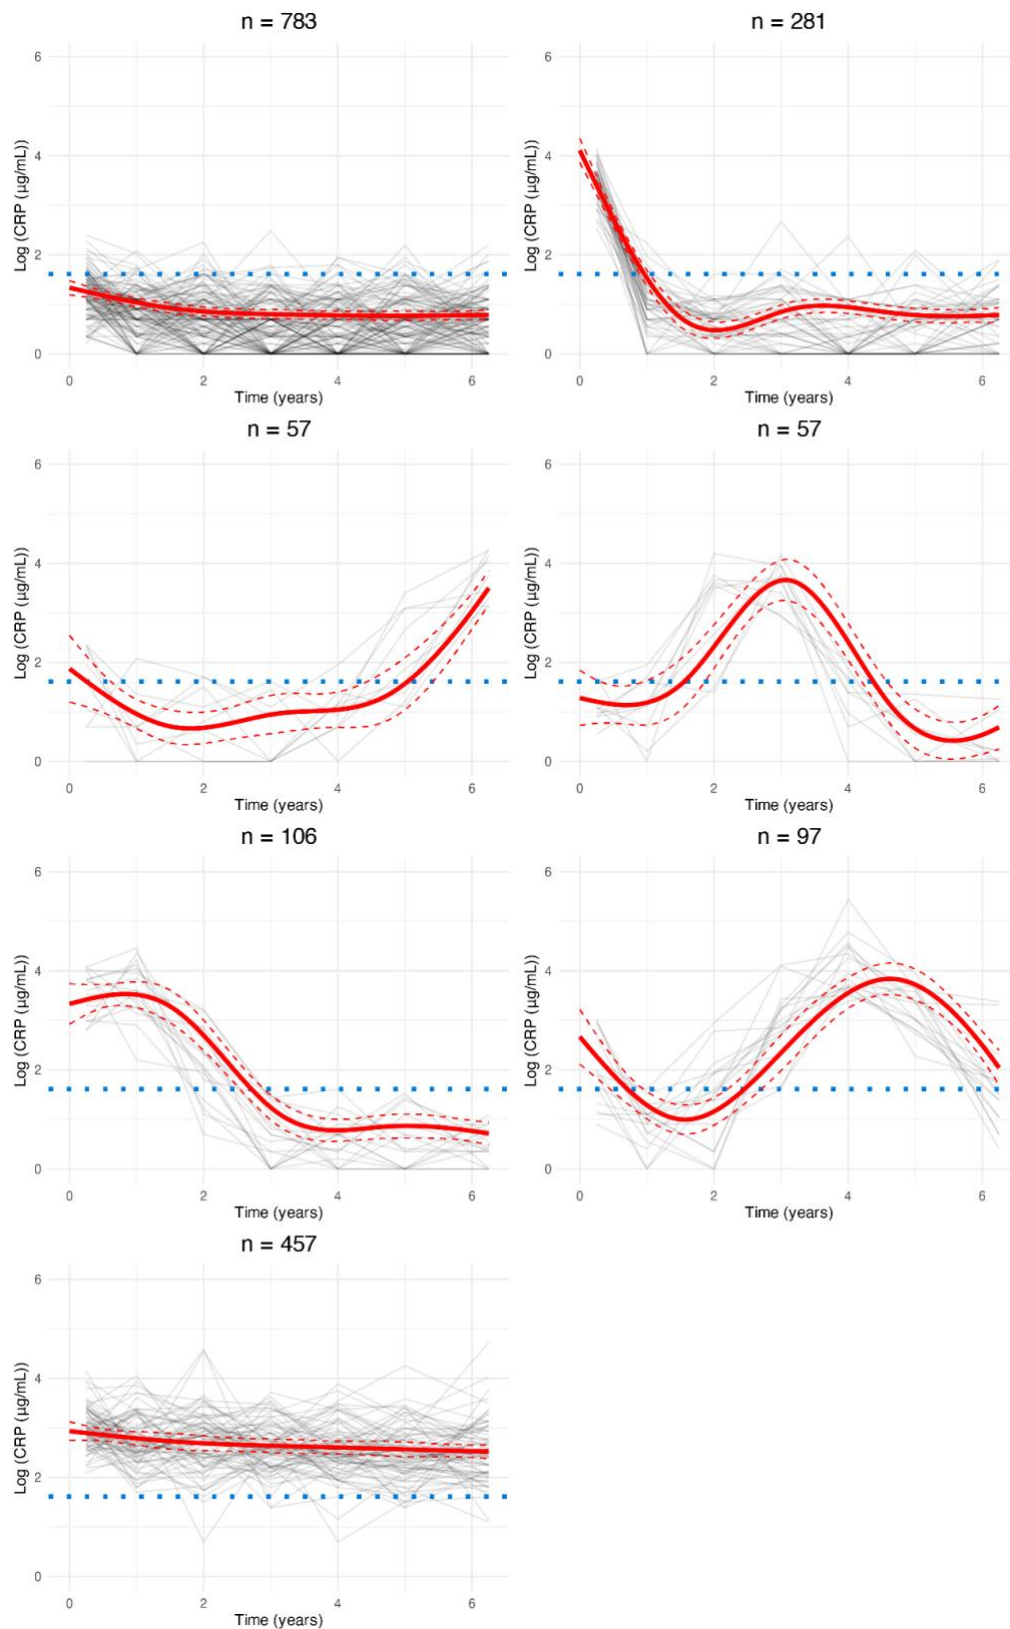

777

778

779

780

781

782

Figure S18. Cluster trajectories obtained from LCMC assuming seven clusters fitted to C-reactive protein data. Red lines indicate predicted mean cluster profiles with 95% confidence intervals. Dotted horizontal lines indicate log(5 μg/mL). For visualisation purposes, pseudo subject-specific trajectories have been generated by amalgamating observations from groups of six subjects.

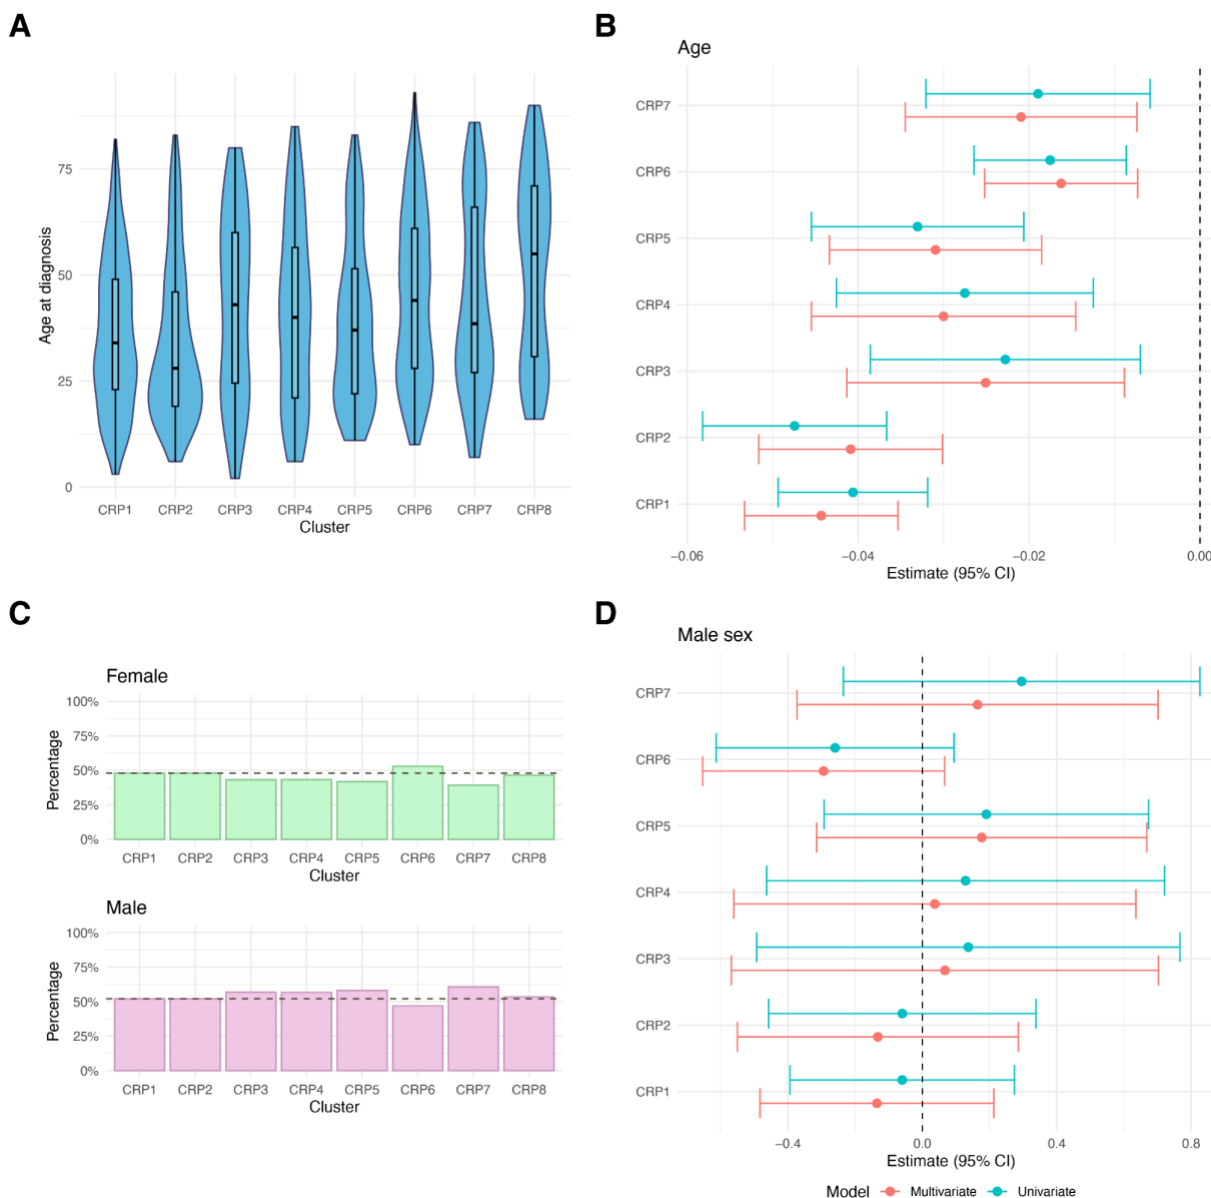

783  
784  
785  
786  
787  
788  
789  
790  
791  
792  
793  
794

Figure S19. (A) For each CRP cluster, violin plots show the distribution of age at diagnosis across subjects, highlighting median and interquartile ranges. (B) Forest plot showing the estimated effect sizes and associated 95% confidence intervals for age in a multinomial logistic regression model that uses CRP cluster assignment as outcome. (C) For each CRP cluster, panels show the proportion of individuals with female and male sex. The dashed horizontal line represents overall proportions across the entire CRP cohort. (D) Forest plot showing the estimated effect sizes and associated 95% confidence intervals for male sex versus females (baseline category) in a multinomial logistic regression model that uses CRP cluster assignment as outcome. In (B) and (C), effect sizes are with respect to the reference cluster (in this case CRP8). In both cases, the multivariate model includes age, sex and IBD type as covariates. The dashed vertical lines are used as a reference to indicate no effect.

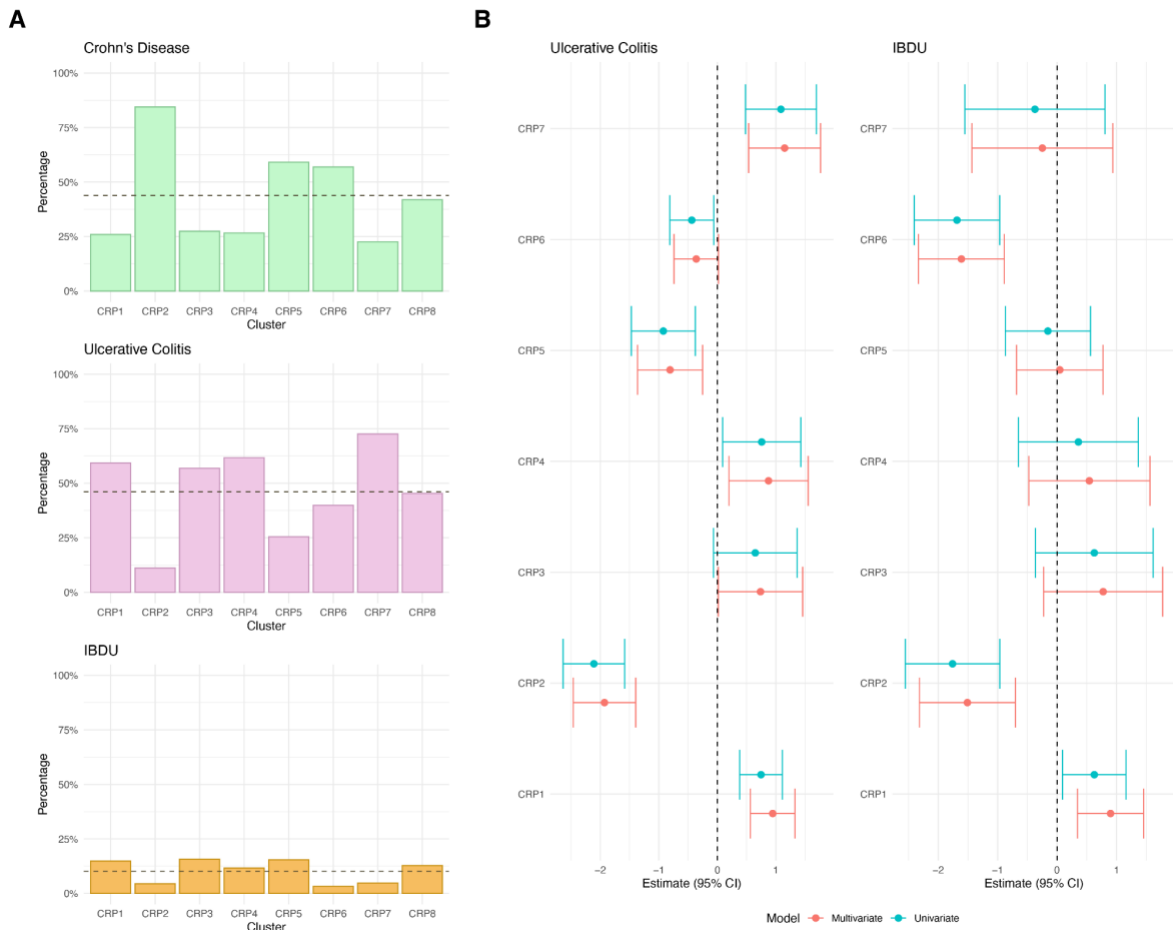

795

796 *Figure S20. (A) For each CRP cluster, panels show the proportion of individuals with Crohn's disease,*

797 *ulcerative colitis and IBDU respectively. The dashed horizontal line represents overall proportions*

798 *across the entire CRP cohort. (B) Forest plot showing the estimated effect sizes and associated 95%*

799 *confidence intervals for IBD type: ulcerative colitis and IBDU versus Crohn's disease (baseline*

800 *category) in a multinomial logistic regression model that uses CRP cluster assignment as outcome.*

801 *Effect sizes are with respect to the reference cluster (in this case CRP8). In both cases, the*

802 *multivariate model includes age, sex and IBD type as covariates. The dashed vertical lines are used*

803 *as a reference to indicate no effect.*

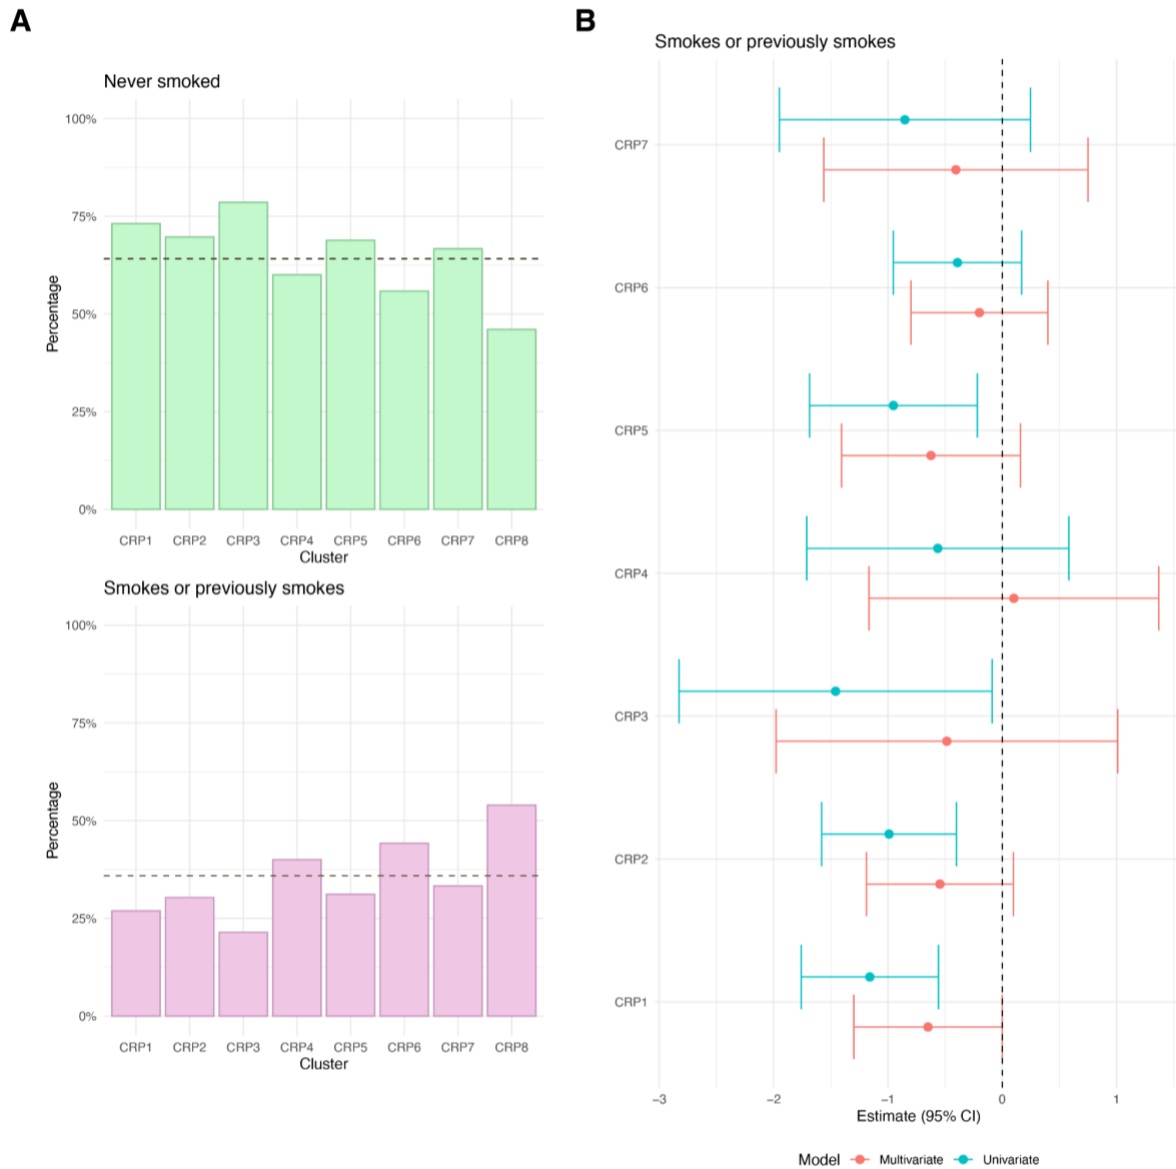

804  
805  
806  
807  
808  
809  
810  
811  
812  
813

Figure S21. Crohn's disease patients only. (A) For each CRP cluster, panels show the proportion of individuals with smoking behaviour recorded as "no" (no and never) and "yes" (current or previously smoked) at diagnosis respectively. The dashed horizontal line represents overall proportions across the entire CRP cohort. (B) Forest plot showing the estimated effect sizes and associated 95% confidence intervals for smoking: yes versus no (baseline category) in a multinomial logistic regression model that uses CRP cluster assignment as outcome. Effect sizes are with respect to the reference cluster (in this case CRP8). The multivariate model includes age, sex, smoking, Montreal location (L1, L2, L3), upper gastrointestinal inflammation (L4), and Montreal behaviour (B1, B2/B3) as covariates. The dashed vertical lines are used as a reference to indicate no effect.



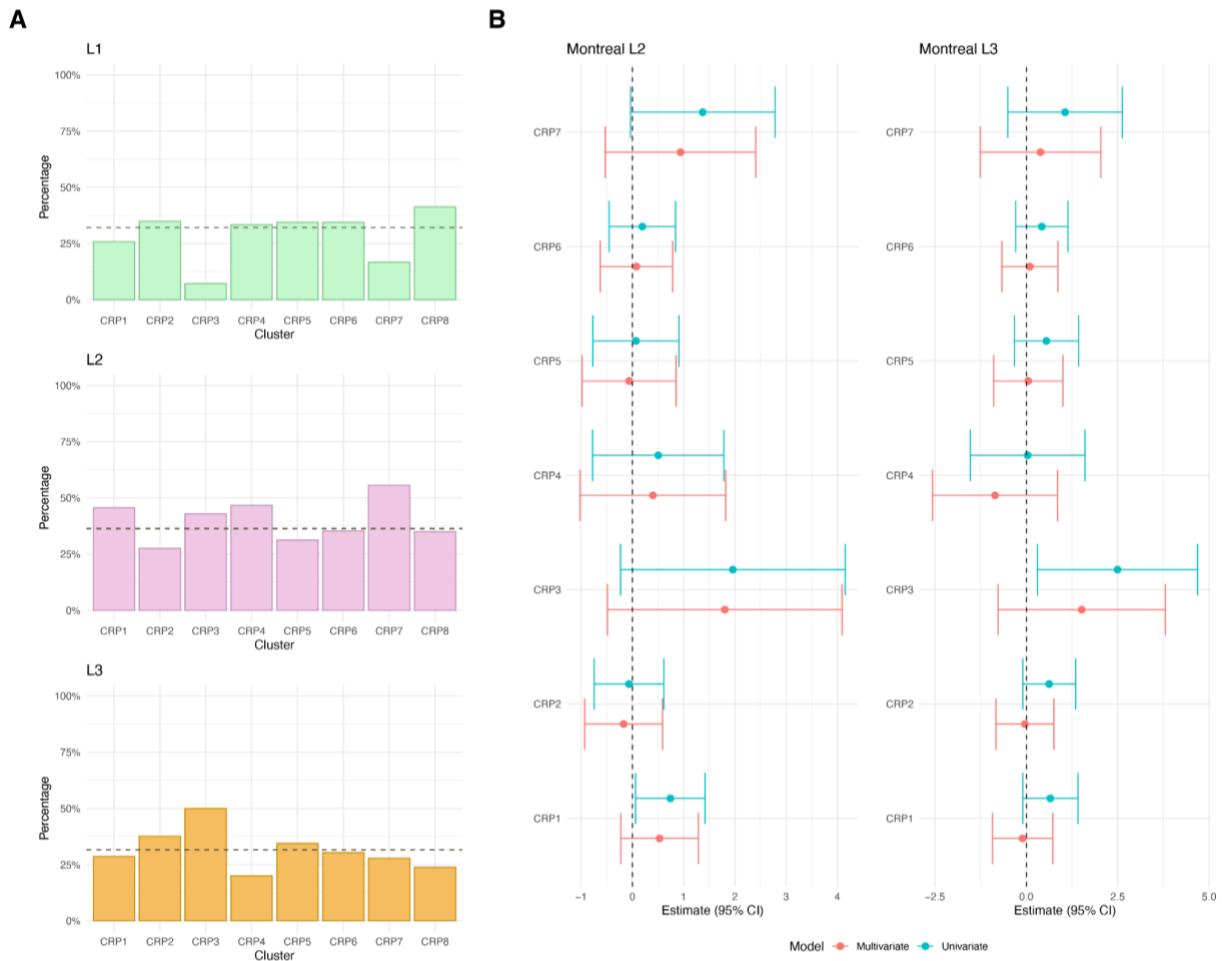

814

815

816

817

818

819

820

821

822

823

*Figure S22. Crohn's disease patients only. (A) For each CRP cluster, panels show the proportion of individuals with Montreal Location recorded as L1, L2 and L3 respectively. The dashed horizontal line represents overall proportions across the entire CRP cohort. (B) Forest plot showing the estimated effect sizes and associated 95% confidence intervals for Montreal Location: L2 and L3 versus L1 (baseline category) in a multinomial logistic regression model that uses CRP cluster assignment as outcome. Effect sizes are with respect to the reference cluster (in this case CRP8). The multivariate model includes age, sex, smoking, Montreal location (L1, L2, L3), upper gastrointestinal inflammation (L4), and Montreal behaviour (B1, B2/B3) as covariates. The dashed vertical lines are used as a reference to indicate no effect.*

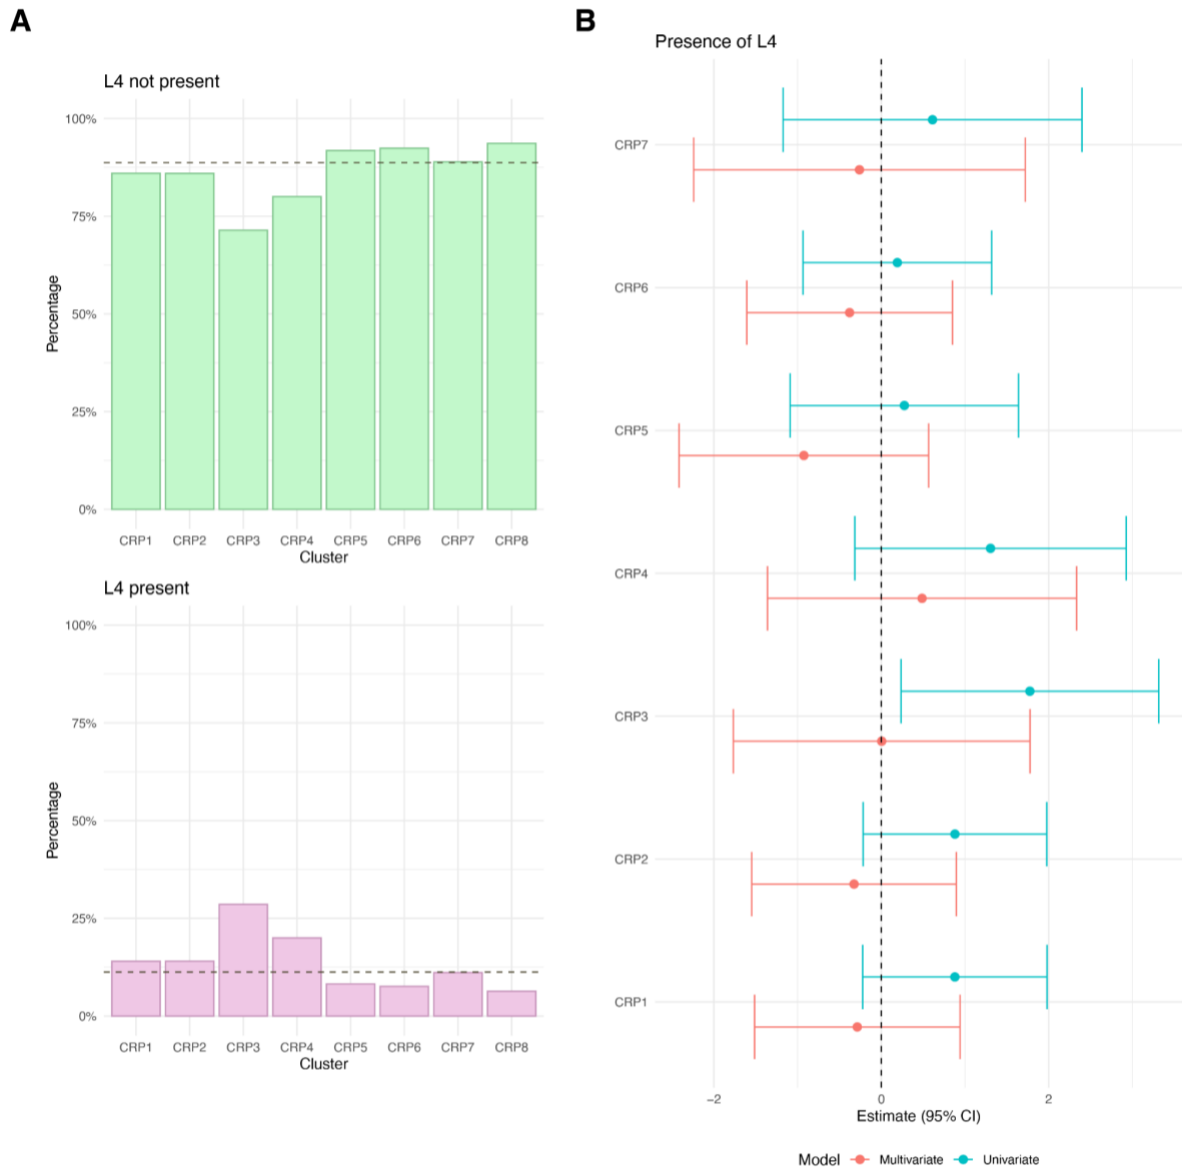

824

825

826

827

828

829

830

831

832

833

*Figure S23. Crohn's disease patients only. (A) For each CRP cluster, panels show the proportion of individuals with Montreal L4 (upper gastrointestinal inflammation), recorded as present or non present. The dashed horizontal line represents overall proportions across the entire CRP cohort. (B) Forest plot showing the estimated effect sizes and associated 95% confidence intervals for L4: present versus not present (baseline category) in a multinomial logistic regression model that uses CRP cluster assignment as outcome. Effect sizes are with respect to the reference cluster (in this case CRP8). The multivariate model includes age, sex, smoking, Montreal location (L1, L2, L3), upper gastrointestinal inflammation (L4), and Montreal behaviour (B1, B2/B3) as covariates. The dashed vertical lines are used as a reference to indicate no effect.*

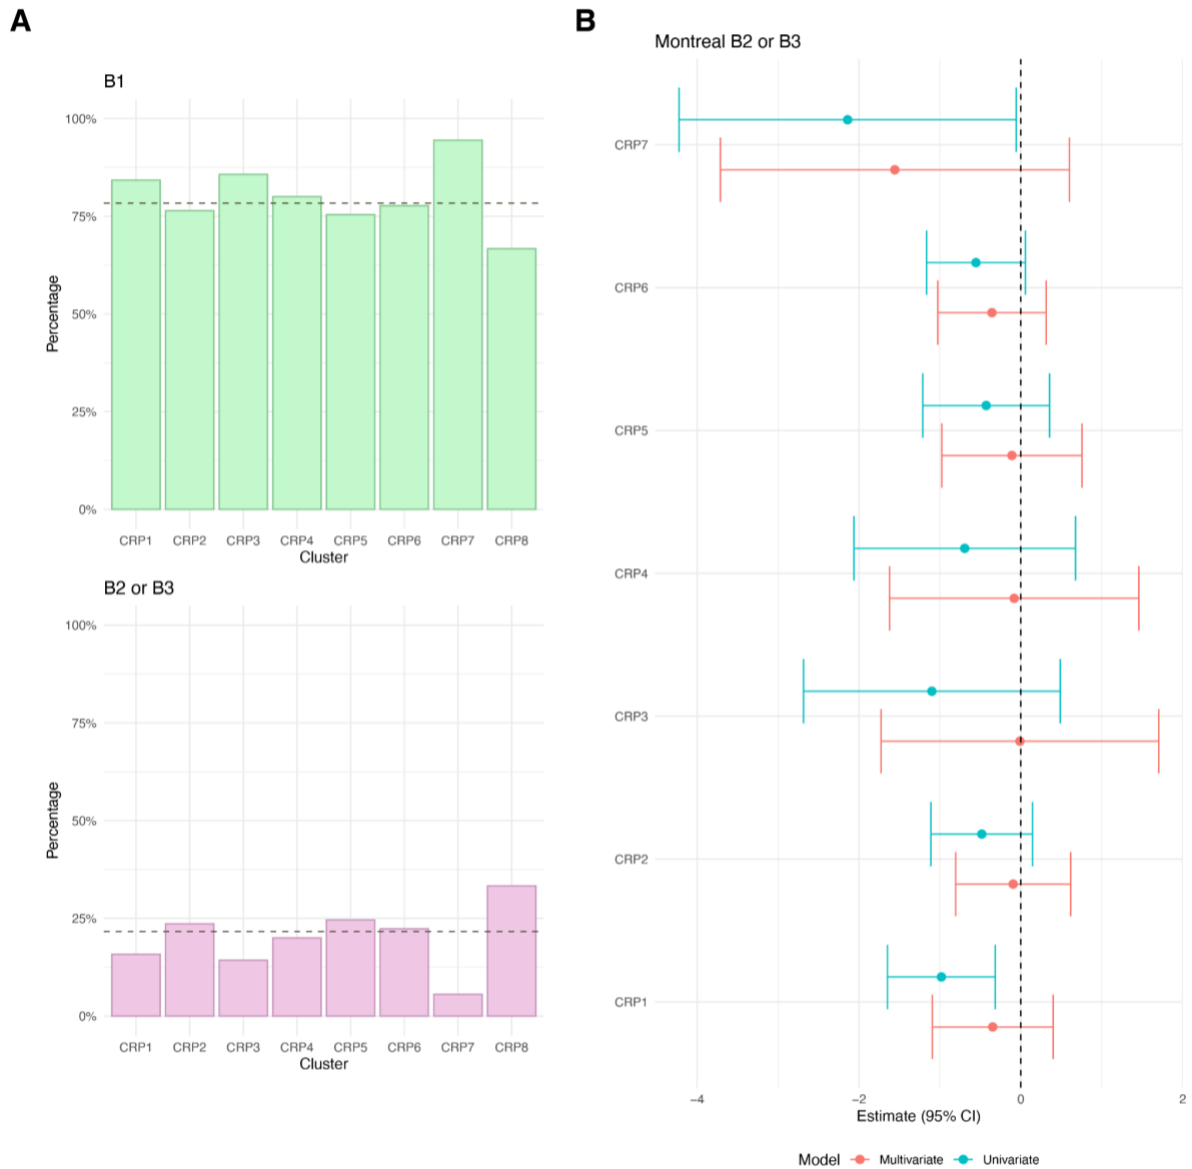

834  
835  
836  
837  
838  
839  
840  
841  
842  
843

*Figure S24. Crohn's disease patients only. (A) For each CRP cluster, panels show the proportion of individuals with Montreal behaviour recorded as B1 or B2/B3 respectively. The dashed horizontal line represents overall proportions across the entire CRP cohort. (B) Forest plot showing the estimated effect sizes and associated 95% confidence intervals for Montreal behaviour: B2/B3 versus B1 (baseline category) in a multinomial logistic regression model that uses CRP cluster assignment as outcome. Effect sizes are with respect to the reference cluster (in this case CRP8). The multivariate model includes age, sex, smoking, Montreal location (L1, L2, L3), upper gastrointestinal inflammation (L4), and Montreal behaviour (B1, B2/B3) as covariates. The dashed vertical lines are used as a reference to indicate no effect.*

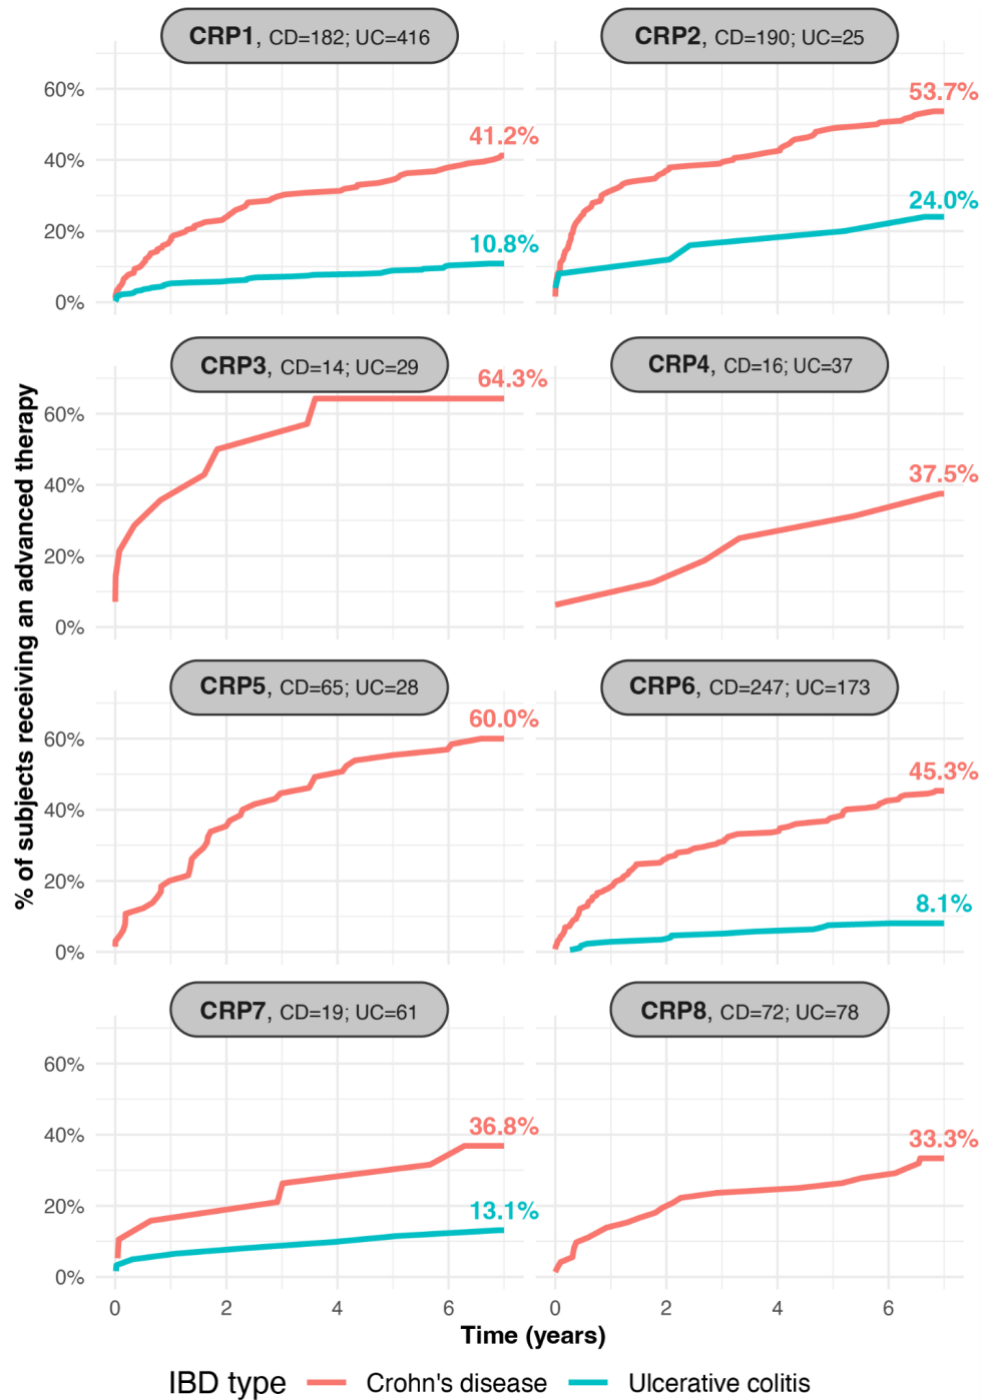

844  
845  
846  
847  
848  
849

Figure S25. CRP cluster-specific cumulative distribution for first-line advanced therapy prescribing for Crohn's disease (red) and ulcerative colitis (teal) subjects. Clusters are ordered from lowest (CRP1) to highest (CRP8) cumulative inflammatory burden. The number of CD and UC subjects present in each cluster is displayed as panel titles. Curves which would describe fewer than five subjects are not shown.

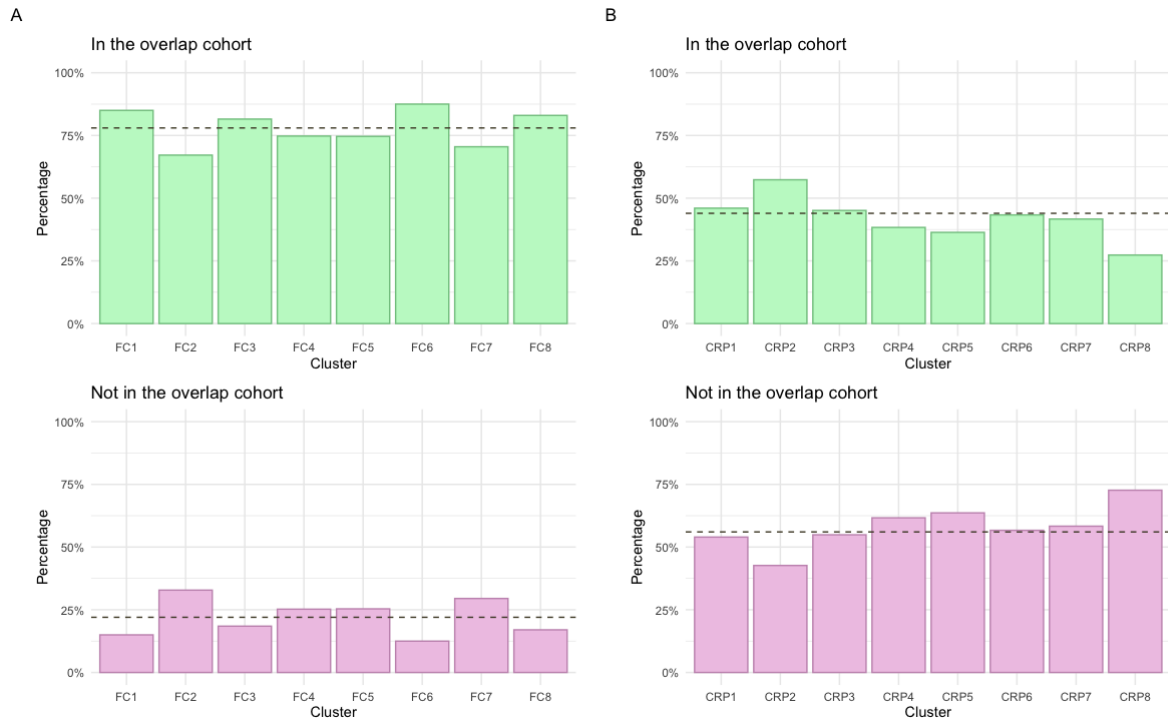

850  
851  
852  
853  
854  
855

*Figure S26. (A) For each FC cluster, panels show the proportion of individuals included in the overlap cohort, which consists of subjects included in both the FC and CRP analysis. The dashed horizontal line represents overall proportions across the entire FC cohort. (B) As in (A), but focusing on CRP clusters instead. The dashed horizontal line represents overall proportions across the entire CRP cohort.*

856 Supplemental tables

| Clusters | Maximum log-likelihood | AIC             | BIC             |
|----------|------------------------|-----------------|-----------------|
| 2        | -16532.10              | 33094.20        | 33168.35        |
| 3        | -16354.39              | 32754.78        | 32868.47        |
| 4        | -16260.21              | 32582.42        | 32735.66        |
| 5        | -16201.86              | 32481.71        | 32674.49        |
| 6        | -16141.82              | 32377.63        | 32609.96        |
| 7        | -16109.77              | 32329.54        | 32601.42        |
| 8        | -16076.89              | 32279.77        | 32591.19        |
| 9        | -16039.66              | 32221.33        | <b>32572.29</b> |
| 10       | <b>-16015.29</b>       | <b>32188.59</b> | 32579.09        |

857 *Table S1. Likelihood-based model statistics for LCMMs fitted to faecal calprotectin data across 2–10*  
 858 *clusters using the chosen model specification. Boldface font indicates optimal values.*

| Clusters | Maximum log-likelihood | AIC             | BIC             |
|----------|------------------------|-----------------|-----------------|
| 2        | -15451.41              | 30932.82        | 31015.57        |
| 3        | -15314.76              | 30675.52        | 30802.40        |
| 4        | -15240.15              | 30542.29        | 30713.30        |
| 5        | -15173.04              | 30424.09        | 30639.23        |
| 6        | -15106.25              | 30306.50        | 30565.78        |
| 7        | -15051.43              | 30212.86        | 30516.27        |
| 8        | -15016.96              | <b>30159.91</b> | <b>30507.45</b> |
| 9        | -15014.76              | 30171.53        | 30563.20        |
| 10       | <b>-15014.40</b>       | 30186.81        | 30622.61        |

859 *Table S2. Likelihood-based model statistics for LCMMs fitted to processed CRP data across 2–10*  
 860 *clusters using the chosen model specification. Boldface font indicates optimal values.*

861
